# Supplementary material for: Near infra-red emitting Ru(ii) complexes of tridentate ligands: electrochemical and photophysical consequences of a strong donor ligand with large bite angles
Source: Royal Society of Chemistry journal article supplement (doi:10.1039/c4sc01604a), 2014-08-22
Supplement: c4sc01604a1.pdf [file c4sc01604a1.pdf]

**Near Infra-Red emitting Ru(II) complexes of tridentate ligands:  
electrochemical and photophysical consequences of strong donor  
ligand with large bite angles**

*Amlan K. Pal,<sup>a</sup> Scolastica Serroni,<sup>b</sup> Nelsi Zaccheroni,<sup>\*c</sup> Sebastiano Campagna,<sup>\*b</sup> and Garry S.  
Hanan<sup>\*a</sup>*

<sup>a</sup>Département de Chimie, Université de Montréal, Montréal, Québec, H3T 1J4, Canada

<sup>b</sup>Dipartimento di Chimica «G. Ciamician», Università di Bologna, 40126 Bologna, Italia

<sup>c</sup>Dipartimento di Scienze Chimiche, Università di Messina, 98166 Messina, Italia

**Electronic Supporting Information**

## Materials and Instrumentation

Nuclear magnetic resonance (NMR) spectra were recorded in CD<sub>3</sub>CN at room temperature (r.t.) on Bruker AV400 (400 MHz) and Bruker AV700 (700 MHz) spectrometers for <sup>1</sup>H NMR and at 100 and 175 MHz for <sup>13</sup>C NMR respectively, as mentioned in the experimental. Chemical shifts are reported in part per million (ppm) relative to residual solvent protons (1.94 ppm for CD<sub>3</sub>CN, 7.26 ppm for CDCl<sub>3</sub>) and the carbon resonance (118.69 ppm for CD<sub>3</sub>CN, 77.00 ppm for CDCl<sub>3</sub>) of the solvent.

Absorption spectra were measured in deaerated acetonitrile at r.t. on a Cary 500i UV-Vis-NIR Spectrophotometer. Corrected fluorescence emission spectra (450 W Xe lamp) in the IR range were obtained with a modular UV-VIS-NIR spectrofluorimeter Edinburgh Instrument, equipped with an Edinburgh Instruments Ge detector (for the 800–1600 nm spectral range). Corrections for instrumental response, inner filter effects and phototube sensitivity were performed. The luminescence quantum yield of **1** and **2** were calculated<sup>1</sup> by optical dilution method recording the emission spectra of the degassed solution in acetonitrile and of a solution of cyanine IR-125 in dimethylsulfoxide ( $\Phi = 0.23$ )<sup>2</sup> as the reference. Luminescence lifetimes were determined by time-correlated single-photon-counting (TCSPC) with an Edinburgh EPL-405 spectrometer (light pulse: picosecond pulse diode laser, pulse width 500 ps at 405 nm). Due to poor spectrometer response and weak signal to noise ratio at 77 K the excited-state lifetime measurements of complexes **1-4** were not possible.

Electrochemical measurements were carried out in argon-purged purified acetonitrile at room temperature with a BAS CV50W multipurpose equipment interfaced to a PC. The working electrode was a glassy carbon electrode. The counter electrode was a Pt wire, and the pseudo-

reference electrode was a silver wire. The reference was set using an internal 1 mM ferrocene/ferrocinium sample at 395 mV vs. SCE in acetonitrile. The concentration of the compounds was about 1 mM. Tetrabutylammonium hexafluorophosphate (TBAP) was used as supporting electrolyte and its concentration was 0.10 M. Cyclic voltammograms were obtained at scan rates of 100 mV/s. The criteria for reversibility were the separation of 60 mV between cathodic and anodic peaks, the close to unity ratio of the intensities of the cathodic and anodic currents, and the constancy of the peak potential on changing scan rate. Experimental uncertainties are as follows: absorption maxima,  $\pm 2$  nm; molar absorption coefficient, 10%; redox potentials,  $\pm 10$  mV.

Hydrated ruthenium trichloride, 1,3,4,6,7,8-Hexahydro-2*H*-pyrimido[1,2-*a*]pyrimidine, 2-bromopyridine, 2,6-dibromopyridine and potassium hexafluorophosphate were purchased from Aldrich Chemicals. The ligands Ph-tpy, Toly-tpy and the complexes [Ru(Ph-tpy)Cl<sub>3</sub>], [Ru(*p*-Toly-tpy)Cl<sub>3</sub>], [Ru(Br-Ph-trz)Cl<sub>3</sub>], [Ru(*t*-Bu-Ph-trz)Cl<sub>3</sub>] starting materials were synthesized following similar literature procedures.<sup>3,4a</sup>

#### *2,4-dipyrid-2'-yl-6-(p-tert-butyl)-1,3,5-triazine (L2)*

The ligand 2,4-dipyrid-2'-yl-6-(*p-tert-butyl*)-1,3,5-triazine was synthesized using a modified literature procedure.<sup>4b,c</sup> To a stirred solution of HNMe<sub>2</sub> (2 M in THF, 8.37 mL, 16.59 mmol) in anhydrous Et<sub>2</sub>O (150 mL) was added *n*-BuLi (1.6 M in hexanes, 10.41 mL, 16.59 mmol), dropwise, under an inert atmosphere. The mixture was stirred for 30 min until a white suspension formed and *p-tert-butyl*benzotrile (2.4 g, 15.08 mmol) was added. Stirring was continued for 1 h at room temperature followed by the addition of 2-cyanopyridine (3.14 g, 30.16 mmol). Stirring was continued for 16 h after which time the reaction was diluted with a 5 : 1 mixture of

water–EtOH (250 mL : 50 mL, v/v) and the solution was heated to remove the Et<sub>2</sub>O. The white precipitate thus formed was collected by filtration and washed with EtOH (10 mL) and Et<sub>2</sub>O (2x25 mL) and dried under vacuum to afford **L2** as a white powder. The compound was crystallized from EtOH-H<sub>2</sub>O. Yield = 3.6 g (65%). <sup>1</sup>H NMR (DMSO-*d*<sub>6</sub>, 400 MHz); 1.37 (s, 9H), 7.64-7.76 (m, 4H), 8.13 (td, *J*<sup>d</sup> = 8.0, 2.0 Hz, 2H), 8.65 (d, *J*<sup>d</sup> = 8.0 Hz, 2H), 8.74 (d, *J*<sup>d</sup> = 8.0 Hz, 2H), 8.91 (d, *J*<sup>d</sup> = 4.0 Hz, 2H). <sup>13</sup>C NMR (DMSO-*d*<sub>6</sub>, 100 MHz); 171.7, 171.1, 156.3, 152.9, 150.1, 137.4, 132.4, 128.7, 126.7, 125.8, 124.7, 34.8, 30.8. HRMS (ESI), *m/z*: 184.59777 [M+2H<sup>+</sup>]<sup>2+</sup> (C<sub>23</sub>H<sub>23</sub>N<sub>5</sub> requires 184.59712), 368.18809 [M+H<sup>+</sup>]<sup>+</sup> (C<sub>23</sub>H<sub>22</sub>N<sub>5</sub> requires 368.18697), 390.16982 [M+Na<sup>+</sup>]<sup>+</sup> (C<sub>23</sub>H<sub>21</sub>N<sub>5</sub>Na requires 390.16892). Anal. Calc for C<sub>23</sub>H<sub>21</sub>N<sub>5</sub> : C, 75.18; H, 5.76; N, 19.06. Found: C, 74.96; H, 5.81; N, 18.94.

*[Ru(p-Tolyl-tpy)(L1)](PF<sub>6</sub>)<sub>2</sub> (2)*

A mixture of [Ru(*p*-Tolyl-tpy)Cl<sub>3</sub>] (100 mg, 0.188 mmol) and 4-ethylmorpholine (10 drops) in nitrogen-degassed *n*-butanol (60 mL) was heated at 80 °C for half an hour to give a dark brown-red suspension. After cooling the mixture to ambient temperature, **L1** (70 mg, 0.197 mmol) was added to the suspension and the resulting mixture was refluxed for 16 h under a nitrogen atmosphere. After 16 h, the dark purple mixture was cooled to ambient temperature and was evaporated to dryness. The resulting solid was purified by chromatography on silica using a mixture of 7/1 (v/v) acetonitrile/saturated aq. KNO<sub>3</sub> to afford the pure complex **2** as a purple solid. The nitrate salt was metathesized to the PF<sub>6</sub> salt by addition of saturated aqueous KPF<sub>6</sub> solution to the aqueous solution of the compound. Crystals suitable for X-ray crystallography were grown by diffusion of diethyl ether into a moderately concentrated solution of the complex in acetone. Yield = 120 mg (60%). <sup>1</sup>H NMR (CD<sub>3</sub>CN, 700 MHz); 8.67 (s, 2H) 8.54 (d, *J*<sup>d</sup> = 8.0 Hz, 2H), 8.14 (t, *J*<sup>t</sup> = 8.0 Hz, 1H), 8.04 (d, *J*<sup>d</sup> = 6.0 Hz, 2H), 7.98 (m, 4H), 7.46 (m, 6H), 4.03 (m,

2H), 3.19 (m, 2H), 3.04 (m, 4H), 2.76 (m, 3H), 2.46 (s, 3H), 2.31 (m, 2H), 2.09 (m, 2H), 1.67 (m, 2H), 1.44 (m, 2H), 1.19 (m, 3H), 0.84 (m, 2H).  $^{13}\text{C}$  NMR ( $\text{CD}_3\text{CN}$ , 175 MHz); 159.8, 158.7, 155.9, 154.1, 153.8, 143.7, 140.9, 140.8, 137.1, 135.3, 130.9, 128.0, 126.8, 123.9, 120.5, 112.8, 49.6, 48.8, 48.4, 43.8, 23.3, 23.1, 21.2. HRMS (ESI),  $m/z$ : 923.24348  $[\text{M-PF}_6]^+$  ( $\text{C}_{41}\text{H}_{44}\text{N}_{10}\text{RuPF}_6$  requires 923.24302), 389.14029  $[\text{M-2PF}_6]^{2+}$  ( $\text{C}_{41}\text{H}_{44}\text{N}_{10}\text{Ru}$  requires 389.13915). Anal. Calc for  $\text{C}_{41}\text{H}_{44}\text{N}_{10}\text{RuP}_2\text{F}_{12}$ : C, 46.11; H, 4.15; N, 13.12. Found: C, 46.13; H, 4.11; N, 13.01.

*[Ru(Br-Ph-dpt)(L1)](PF<sub>6</sub>)<sub>2</sub> (3)*

A mixture of  $\text{Ru}(\text{Br-Ph-dpt})\text{Cl}_3$  (100 mg, 0.167 mmol) and 4-ethylmorpholine (10 drops) in nitrogen-degassed *n*-butanol (60 mL) was heated at 80 °C for half an hour to give a dark brown-red suspension. After cooling of the mixture to ambient temperature, **L1** (62 mg, 0.175 mmol) was added to the suspension and the resulting mixture was refluxed for 16 h under a nitrogen atmosphere. After 14 h, the dark purple mixture was cooled to ambient temperature and was evaporated to dryness. The resulting solid was purified by chromatography on silica using a mixture of 7/1 (v/v) acetonitrile/saturated aq.  $\text{KNO}_3$  to afford the pure complex **3** as a purple solid. The nitrate salt was metathesized to the  $\text{PF}_6$  salt by addition of saturated aqueous  $\text{KPF}_6$  solution to the aqueous solution of the compound. Crystals suitable for X-ray crystallography were grown by diffusion of diethyl ether into a moderately concentrated solution of the complex in acetone. Yield = 90 mg (47%).  $^1\text{H}$  NMR ( $\text{CD}_3\text{CN}$ , 700 MHz); 9.04 (d,  $J^d = 7.0$  Hz, 2H), 8.49 (d,  $J^d = 8.0$  Hz, 2H), 8.23 (m, 3H), 8.20 (t,  $J^t = 7.0$  Hz, 2H), 7.89 (d,  $J^d = 8.0$  Hz, 2H), 7.73 (t,  $J^t = 7.0$  Hz, 2H), 7.58 (d,  $J^d = 8.0$  Hz, 2H), 4.12 (d,  $J^d = 14.0$  Hz, 2H), 3.22 (m, 2H), 3.08 (t,  $J^t = 13.0$  Hz, 2H), 3.01 (m, 2H), 2.73 (m, 4H), 2.34 (m, 2H), 2.12 (m, 2H), 1.47 (m, 2H), 1.18 (m, 4H), 0.78 (m, 2H).  $^{13}\text{C}$  NMR ( $\text{CD}_3\text{CN}$ , 175 MHz); 172.9, 162.3, 155.6, 155.4, 155.3, 154.3,

141.7, 137.9, 135.8, 133.4, 131.2, 129.9, 127.9, 127.6, 113.0, 49.4, 48.9, 48.2, 44.0, 23.2, 23.1. HRMS (ESI), m/z: 989.12744 [M-PF<sub>6</sub>]<sup>+</sup> (C<sub>38</sub>H<sub>39</sub>N<sub>12</sub>BrRuPF<sub>6</sub> requires 989.12838), 422.08339 [M-2PF<sub>6</sub>]<sup>2+</sup> (C<sub>38</sub>H<sub>39</sub>N<sub>12</sub>BrRu requires 422.08183). Anal. Calc for C<sub>38</sub>H<sub>39</sub>N<sub>12</sub>BrRuP<sub>2</sub>F<sub>12</sub> : C, 40.22; H, 3.46; N, 14.81. Found: C, 40.08; H, 3.45; N, 14.54.

*[Ru(<sup>t</sup>Bu-Ph-dpt)(L1)](PF<sub>6</sub>)<sub>2</sub> (4)*

A mixture of Ru(<sup>t</sup>Bu-Ph-dpt)Cl<sub>3</sub> (100 mg, 0.174 mmol) and 4-ethylmorpholine (10 drops) in nitrogen-degassed *n*-butanol (60 mL) was heated at 80 °C for half an hour to give a dark brown-red suspension. After cooling of the mixture to ambient temperature, **L1** (65 mg, 0.84 mmol) was added to the suspension and the resulting mixture was refluxed for 16 h under a nitrogen atmosphere. After 16 h, the dark purple mixture was cooled to ambient temperature and was evaporated to dryness. The resulting solid was purified by chromatography on silica using a mixture of 7/1 (v/v) acetonitrile/saturated aq. KNO<sub>3</sub> to afford the pure complex **4** as a purple solid. The nitrate salt was metathesized to the PF<sub>6</sub> salt by addition of saturated aqueous KPF<sub>6</sub> solution to the aqueous solution of the compound. Crystals suitable for X-ray crystallography were grown by diffusion of diethyl ether into a moderately concentrated solution of the complex in acetone. Yield = 110 mg (60%). <sup>1</sup>H NMR (CD<sub>3</sub>CN, 700 MHz); 9.02 (d, J<sup>d</sup> = 8.0 Hz, 2H), 8.85 (d, J<sup>d</sup> = 8.0 Hz, 2H), 8.22 (t, J<sup>t</sup> = 8.0 Hz, 1H), 8.17 (m, 4H), 7.77 (d, J<sup>d</sup> = 8.0 Hz, 2H), 7.72 (t, J<sup>t</sup> = 6.0 Hz, 2H), 7.56 (d, J<sup>d</sup> = 8.0 Hz, 2H), 4.11 (d, J<sup>d</sup> = 16.0 Hz, 2H) 3.13-2.76 (m, 8H), 2.34 (m, 2H), 2.12 (m, 2H), 1.50 (m, 2H), 1.44 (s, 9H), 1.21 (m, 6H), 0.81 (m, 2H). <sup>13</sup>C NMR (CD<sub>3</sub>CN, 175 MHz); 172.9, 163.8, 157.8, 155.8, 155.6, 155.5, 154.3, 141.6, 137.8, 133.8, 129.8, 129.6, 127.5, 127.2, 118.2, 113.0, 49.5, 48.9, 48.30, 44.0, 35.8, 31.2, 23.2, 23.1. HRMS (ESI), m/z: 967.27643 [M-PF<sub>6</sub>]<sup>+</sup> (C<sub>42</sub>H<sub>48</sub>N<sub>12</sub>Ru PF<sub>6</sub> requires 967.28047), 411.15951 [M-2PF<sub>6</sub>]<sup>2+</sup>

(C<sub>42</sub>H<sub>48</sub>N<sub>12</sub>Ru requires 411.15787). Anal. Calc for C<sub>42</sub>H<sub>48</sub>N<sub>12</sub>Ru<sub>1</sub>P<sub>2</sub>F<sub>12</sub>: C, 45.37; H, 4.35; N, 15.12. Found: C, 45.38; H, 4.38; N, 15.04.

### Crystallographic Section

Diffraction data were collected on a Bruker SMART 6000 with Montel 200 monochromator, equipped with a rotating anode source for Cu K $\alpha$  radiation. The diffraction quality of the crystals were checked, revealing in some cases poor diffraction with a large amount of diffuse scattering, signaling extensive crystal disorder. Cell refinement and data reduction were done using APEX2.<sup>5</sup> Absorption corrections were applied using SADABS.<sup>6</sup> Structures were solved by direct methods using SHELXS97 and refined on  $F^2$  by full-matrix least squares using SHELXL97.<sup>7</sup> All non-hydrogen atoms were refined anisotropically. Hydrogen atoms were refined isotropic on calculated positions using a riding model. For complexes **1** and **4**, during the refinement of the structure, electron density peaks were located and were believed to be six severely disordered solvated acetone molecules, and a total of one disordered water and eight disordered acetone molecules, respectively (by counting the number of electrons suppressed). All the attempts made to model the solvent molecules were not successful and they were removed using the SQUEEZE routine from PLATON,<sup>8</sup> which resulted in a significant improvement of R1 factor by ~3.5% in all the squeezed structures. For compound **1**, the highest difference peak is located 1.09 Å from atom F4 and the deepest hole is 0.51 Å from atom F1A. In addition, three peaks of density ~2 to 1 e/Å<sup>3</sup> were present essentially due to the quality of the crystal employed, which was the best available, and is believed due to the frequent discrete positional disorder of the freely rotating anions (see .cif file for more details). The structure of **2** and **4** also showed that the guanidine moiety is positionally disordered over two positions. The disorder was modelled as two components [ $\sim$ 0.58:0.42 for **2** and  $\sim$ 0.60:0.40 for **4**] and refined anisotropically. In complexes **1**

and 4 positional disorders in anion or solvent molecules were observed, and they were resolved in the aforesaid way. Some atomic displacement restraints were applied among the disorder components to model the anion positions in **1** but not applicable for the cation structure.

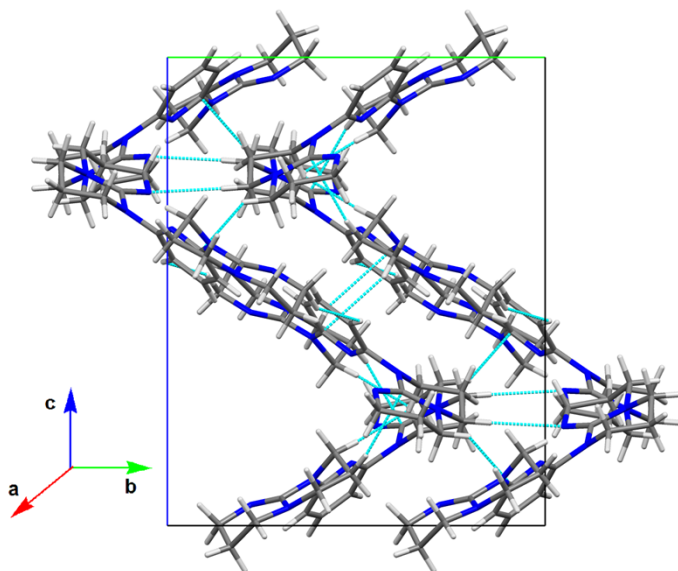

**Figure S1.** Packing diagram of ligand **L1** along crystallographic *a*-axis. Colour code: carbon: grey, nitrogen: slate blue; C-H and N-H intermolecular interactions: cyan dashed.



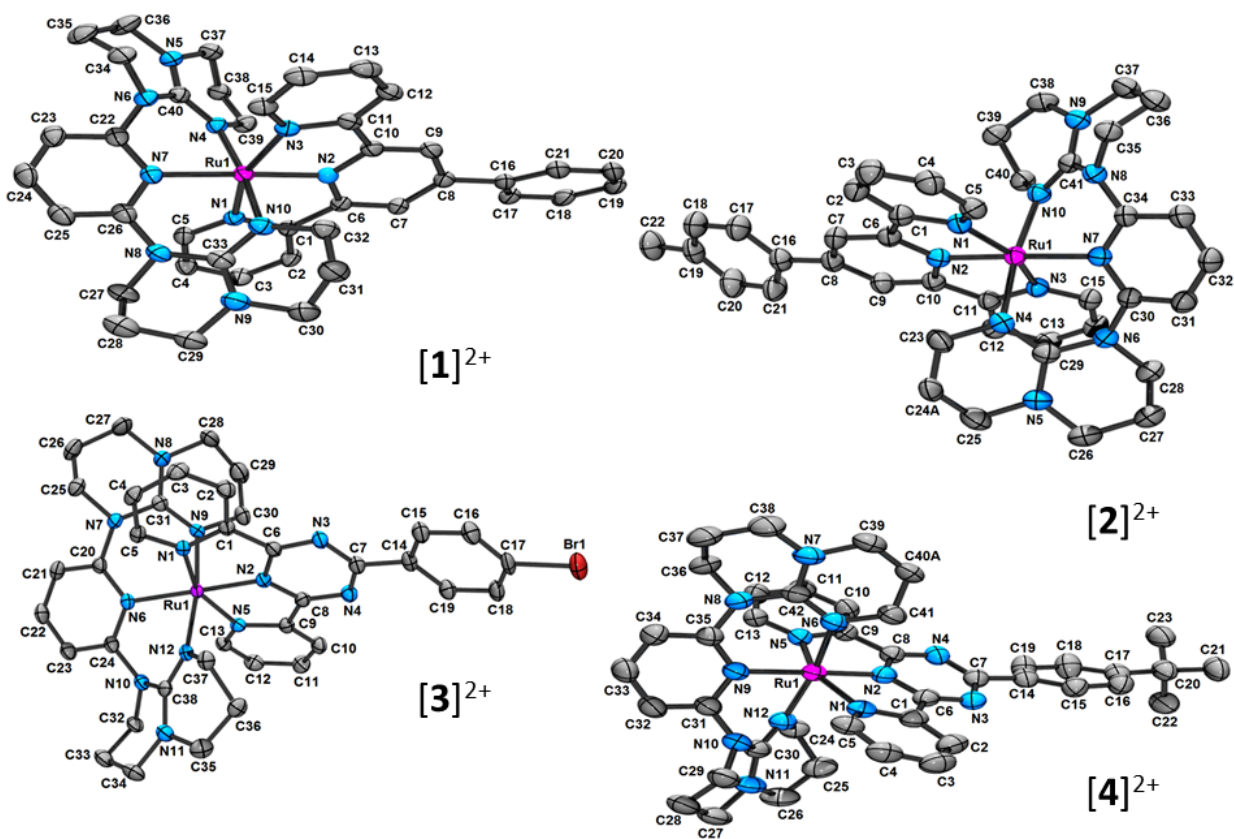

**Figure S2.** Perspective views of complexes 1–4, as cations only, with complete labeling. Ellipsoids correspond to a 50% probability level. Hydrogen atoms, anions, solvent molecules and disordered components of 2 and 4 are omitted for clarity.

**Table S1.** Comparison of bond distances and angles in **1–4** from X-ray and DFT studies

| Compound | Bond Length |                    | Angle              |            |                  |                  |         |
|----------|-------------|--------------------|--------------------|------------|------------------|------------------|---------|
|          |             | Obs.<br>(X-ray)    | Calc.<br>(DFT)     |            | Obs.<br>(X-ray)  | Calc.<br>(DFT)   |         |
| <b>1</b> | N1-Ru1      | 2.0646<br>(0.0024) | 2.12887            | N1-Ru1-N3  | 159.28<br>(0.10) | 157.256          |         |
|          | N2-Ru1      | 1.9462<br>(0.0024) | 1.98758            | N4-Ru1-N10 | 173.83<br>(0.10) | 172.513          |         |
|          | N3-Ru1      | 2.0761<br>(0.0025) | 2.12874            |            |                  |                  |         |
|          | N4-Ru1      | 2.0711<br>(0.0025) | 2.13996            |            |                  |                  |         |
|          | N7-Ru1      | 2.0720<br>(0.0025) | 2.11279            |            |                  |                  |         |
|          | N10-Ru1     | 2.0919<br>(0.0026) | 2.13997            |            |                  |                  |         |
|          | N4-C40      | 1.3050<br>(0.0039) | 1.31063            |            |                  |                  |         |
|          | N5-C40      | 1.3498<br>(0.0043) | 1.36487            |            |                  |                  |         |
|          | N6-C40      | 1.4072<br>(0.0040) | 1.40913            |            |                  |                  |         |
|          | N10-C33     | 1.3102<br>(0.0043) | 1.31062            |            |                  |                  |         |
|          | N9-C33      | 1.3430<br>(0.0045) | 1.36485            |            |                  |                  |         |
|          | N8-C33      | 1.3998<br>(0.0043) | 1.40917            |            |                  |                  |         |
|          | <b>2</b>    | N1-Ru1             | 2.0859<br>(0.0019) | 2.12784    | N1-Ru1-N3        | 158.89<br>(0.08) | 157.238 |
|          |             | N2-Ru1             | 1.9307<br>(0.0018) | 1.98638    | N4-Ru1-N10       | 172.68<br>(0.07) | 171.592 |
| N3-Ru1   |             | 2.0722<br>(0.0019) | 2.12795            |            |                  |                  |         |
| N4-Ru1   |             | 2.0947<br>(0.0019) | 2.13422            |            |                  |                  |         |
| N7-Ru1   |             | 2.0707<br>(0.0018) | 2.11501            |            |                  |                  |         |
| N10-Ru1  |             | 2.0639<br>(0.0018) | 2.13415            |            |                  |                  |         |
| N4-C29   |             | 1.3080<br>(0.0030) | 1.31024            |            |                  |                  |         |
| N5-C29   |             | 1.3502<br>(0.0030) | 1.36492            |            |                  |                  |         |
| N6-C29   |             | 1.3842<br>(0.0030) | 1.40789            |            |                  |                  |         |
| N10-C41  |             | 1.3042<br>(0.0029) | 1.31024            |            |                  |                  |         |
| N9-C41   |             | 1.3434<br>(0.0029) | 1.36494            |            |                  |                  |         |

|          |          |                    |                    |            |                  |                  |
|----------|----------|--------------------|--------------------|------------|------------------|------------------|
|          | N8-C41   | 1.4044<br>(0.0028) | 1.40794            |            |                  |                  |
| <b>3</b> | N1-Ru1   | 2.0789<br>(0.0029) | 2.10617            | N1-Ru1-N5  | 157.19<br>(0.15) | 157.189          |
|          | N2-Ru1   | 1.9247<br>(0.0028) | 1.91497            | N9-Ru1-N12 | 171.51<br>(0.13) | 171.637          |
|          | N5-Ru1   | 2.0876<br>(0.0027) | 2.07686            |            |                  |                  |
|          | N6-Ru1   | 2.0688<br>(0.0028) | 2.06985            |            |                  |                  |
|          | N9-Ru1   | 2.0874<br>(0.0029) | 2.09241            |            |                  |                  |
|          | N12-Ru1  | 2.0628<br>(0.0029) | 2.06290            |            |                  |                  |
|          | N9-C31   | 1.3082<br>(0.0058) | 1.31015            |            |                  |                  |
|          | N8-C31   | 1.3563<br>(0.0060) | 1.34625            |            |                  |                  |
|          | N7-C31   | 1.3778<br>(0.0059) | 1.38473            |            |                  |                  |
|          | N12-C38  | 1.3040<br>(0.0054) | 1.30261            |            |                  |                  |
|          | N11-C38  | 1.3433<br>(0.0055) | 1.34104            |            |                  |                  |
|          | N10-C38  | 1.4041<br>(0.0052) | 1.40823            |            |                  |                  |
|          | <b>4</b> | N1-Ru1             | 2.0897<br>(0.0020) | 2.15308    | N1-Ru1-N5        | 156.29<br>(0.09) |
| N2-Ru1   |          | 1.9297<br>(0.0022) | 1.97508            | N6-Ru1-N12 | 171.02<br>(0.08) | 171.488          |
| N5-Ru1   |          | 2.1074<br>(0.0020) | 2.15333            |            |                  |                  |
| N6-Ru1   |          | 2.0784<br>(0.0020) | 2.13339            |            |                  |                  |
| N9-Ru1   |          | 2.0857<br>(0.0021) | 2.11261            |            |                  |                  |
| N12-Ru1  |          | 2.0888<br>(0.0020) | 2.13352            |            |                  |                  |
| N12-C30  |          | 1.3075<br>(0.0032) | 1.31100            |            |                  |                  |
| N11-C30  |          | 1.3396<br>(0.0031) | 1.36403            |            |                  |                  |
| N10-C30  |          | 1.3945<br>(0.0032) | 1.40833            |            |                  |                  |
| N6-C42   |          | 1.2966<br>(0.0032) | 1.31096            |            |                  |                  |
| N7-C42   |          | 1.3481<br>(0.0032) | 1.36409            |            |                  |                  |
| N8-C42   |          | 1.3988<br>(0.0032) | 1.40847            |            |                  |                  |

**Table S2.** Spectroscopic and photophysical data in CH<sub>3</sub>CN solutions for Ligands **L1**, **L2** and complexes **1–4**.

| Compounds                                   | $\lambda_{\max}$ , nm ( $\epsilon \times 10^3$ , M <sup>-1</sup> cm <sup>-1</sup> ) |           |           |                        |           |          |          |
|---------------------------------------------|-------------------------------------------------------------------------------------|-----------|-----------|------------------------|-----------|----------|----------|
| <b>L1</b>                                   | 228(29.0)                                                                           | 311(12.8) |           |                        |           |          |          |
| <b>L2</b>                                   | 245(9.7)                                                                            | 285(20.9) |           |                        |           |          |          |
| <b>1</b>                                    | 225(44.7)                                                                           | 244(39.3) | 289(45.9) | 317(23.1)              | 379(10.5) | 541(8.8) | 622(5.6) |
| <b>2</b>                                    | 225(44.8)                                                                           | 247(39.7) | 288(45.1) | 313(27.9)              | 383(11.3) | 538(9.4) | 620(6.2) |
| <b>3</b>                                    | 244(33.3)                                                                           | 291(35.3) | 380(7.0)  | 411(8.6)               | 560(11.8) | 740(3.8) |          |
| <b>4</b>                                    | 243(29.1)                                                                           | 288(27.8) | 373(6.7)  | 405(7.0)               | 558(9.3)  | 740(3.0) |          |
| [Ru(tpy) <sub>2</sub> ] <sup>2+</sup>       |                                                                                     | 270(40.9) | 307(66.7) | 475(15.3) <sup>a</sup> |           |          |          |
| [Ru(Br-Ph-dpt)(tpy)] <sup>2+</sup>          |                                                                                     | 282(53.5) | 301(59.6) | 476(21.7) <sup>b</sup> |           |          |          |
| [Ru(Br-Ph-dpt) <sub>2</sub> ] <sup>2+</sup> |                                                                                     | 279(50.9) | 295(50.6) | 491(27.5) <sup>b</sup> |           |          |          |

<sup>a</sup>from ref 9, <sup>b</sup>from ref 10**DFT Calculations:****Table S3.** MO composition of [1]<sup>2+</sup> in singlet (*S*=0) ground state (b3lyp/LanL2DZ(f)[Ru]6-31G\*\*[C,H,N]).

| MO          | Energy (eV)  | Approximate Composition (%) |           |           |
|-------------|--------------|-----------------------------|-----------|-----------|
|             |              | Ru                          | Ph-tpy    | hpp       |
| LUMO+5      | -0.99        | 1                           | 1         | 98        |
| LUMO+4      | -1.25        | 3                           | 95        | 2         |
| LUMO+3      | -1.36        | 1                           | 99        | 0         |
| LUMO+2      | -1.43        | 4                           | 2         | 94        |
| LUMO+1      | -2.27        | 2                           | 98        | 0         |
| <b>LUMO</b> | <b>-2.46</b> | <b>9</b>                    | <b>88</b> | <b>2</b>  |
| <b>HOMO</b> | <b>-5.37</b> | <b>57</b>                   | <b>18</b> | <b>25</b> |
| HOMO-1      | -5.37        | 61                          | 10        | 29        |
| HOMO-2      | -5.86        | 84                          | 10        | 6         |
| HOMO-3      | -6.56        | 2                           | 1         | 97        |
| HOMO-4      | -6.69        | 5                           | 26        | 70        |
| HOMO-5      | -6.85        | 13                          | 22        | 66        |

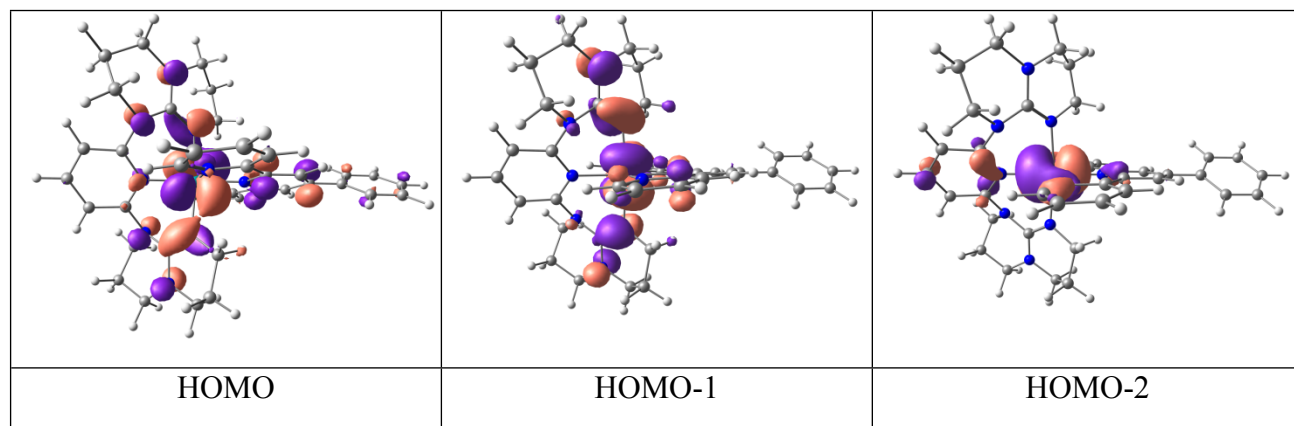

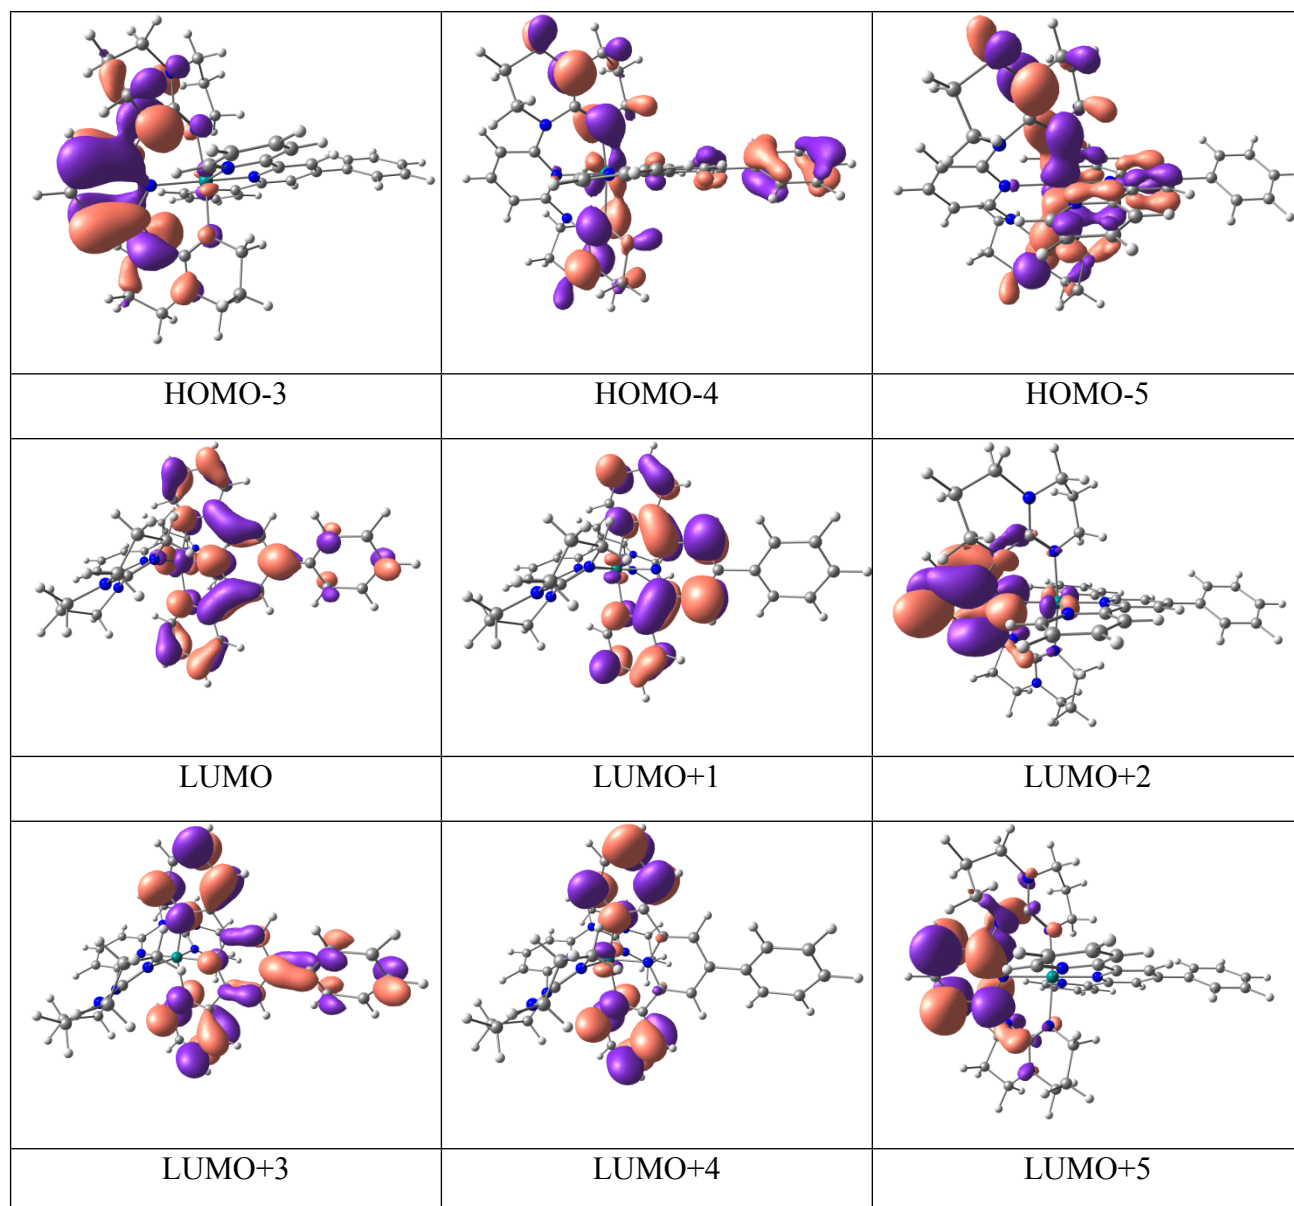

**Figure S3.** Kohn-Sham molecular orbital sketches for  $[1]^{2+}$  in ( $S=0$ ) ground state

**Table S4.** Selected transitions from TD-DFT calculations of [1]<sup>2+</sup> in the singlet ground state (b3lyp/LanL2DZ(f)[Ru]6-31G\*\*[C,H,N], CPCM (CH<sub>3</sub>CN)).

| state | energy (eV) | $\lambda/n$ m | $\lambda/nm$ ( $\epsilon \times 10^3 \text{ M}^{-1}\text{cm}^{-1}$ ) [expt.] | f      | Major transition(s)                            | Character                                                                                 |
|-------|-------------|---------------|------------------------------------------------------------------------------|--------|------------------------------------------------|-------------------------------------------------------------------------------------------|
| 58    | 5.03        | 246           | 244 (39.3)                                                                   | 0.2525 | H-3->L+5 (68%)                                 | Hpp (n/ $\pi$ ) to Hpp (n/ $\pi^*$ )                                                      |
| 41    | 4.44        | 279           | 289 (45.9)                                                                   | 0.3477 | H-7->L+1 (61%),<br>H-8->L+1 (13%)              | Ph-tpy( $\pi$ ) to Ph-tpy( $\pi^*$ )                                                      |
| 29    | 4.02        | 308           | 317 (23.1)                                                                   | 0.2449 | H-7->L (51%)                                   | Ph-tpy( $\pi$ ) to Ph-tpy( $\pi^*$ )                                                      |
| 11    | 3.34        | 371           | 379 (10.5)                                                                   | 0.0632 | H-1->L+3 (92%)                                 | Ru(d $\pi$ ) to Ph-tpy( $\pi^*$ ) (major) + hpp(n/ $\pi$ ) to Ph-tpy( $\pi^*$ ) (minor)   |
| 2     | 2.20        | 562           | 541 (8.8)                                                                    | 0.0444 | H->L (64%),<br>H-1->L+1 (20%),<br>H-2->L (10%) | Ru(d $\pi$ ) to Ph-tpy( $\pi^*$ ) + (major) + hpp(n/ $\pi$ ) to Ph-tpy( $\pi^*$ ) (minor) |
| 1     | 2.01        | 616           | 622 (5.6)                                                                    | 0.0117 | H-1->L (94%)                                   | Ru(d $\pi$ ) to Ph-tpy( $\pi^*$ ) + (major) + hpp(n/ $\pi$ ) to Ph-tpy( $\pi^*$ ) (minor) |

**Table S5.** MO composition of [2]<sup>2+</sup> in singlet (*S*=0) ground state (b3lyp/LanL2DZ(f)[Ru]6-31G\*\*[C,H,N]).

| MO          | Energy (eV)  | Approximate Composition (%) |           |           |
|-------------|--------------|-----------------------------|-----------|-----------|
|             |              | Ru                          | Tolyl-tpy | hpp       |
| LUMO+5      | -1.01        | 1                           | 1         | 99        |
| LUMO+4      | -1.22        | 3                           | 95        | 1         |
| LUMO+3      | -1.35        | 1                           | 98        | 1         |
| LUMO+2      | -1.44        | 3                           | 2         | 95        |
| LUMO+1      | -2.26        | 2                           | 97        | 1         |
| <b>LUMO</b> | <b>-2.45</b> | <b>9</b>                    | <b>88</b> | <b>3</b>  |
| <b>HOMO</b> | <b>-5.34</b> | <b>57</b>                   | <b>19</b> | <b>24</b> |
| HOMO-1      | -5.35        | 62                          | 10        | 28        |
| HOMO-2      | -5.85        | 83                          | 11        | 6         |
| HOMO-3      | -6.58        | 4                           | 3         | 93        |
| HOMO-4      | -6.61        | 1                           | 63        | 36        |
| HOMO-5      | -6.88        | 9                           | 29        | 63        |

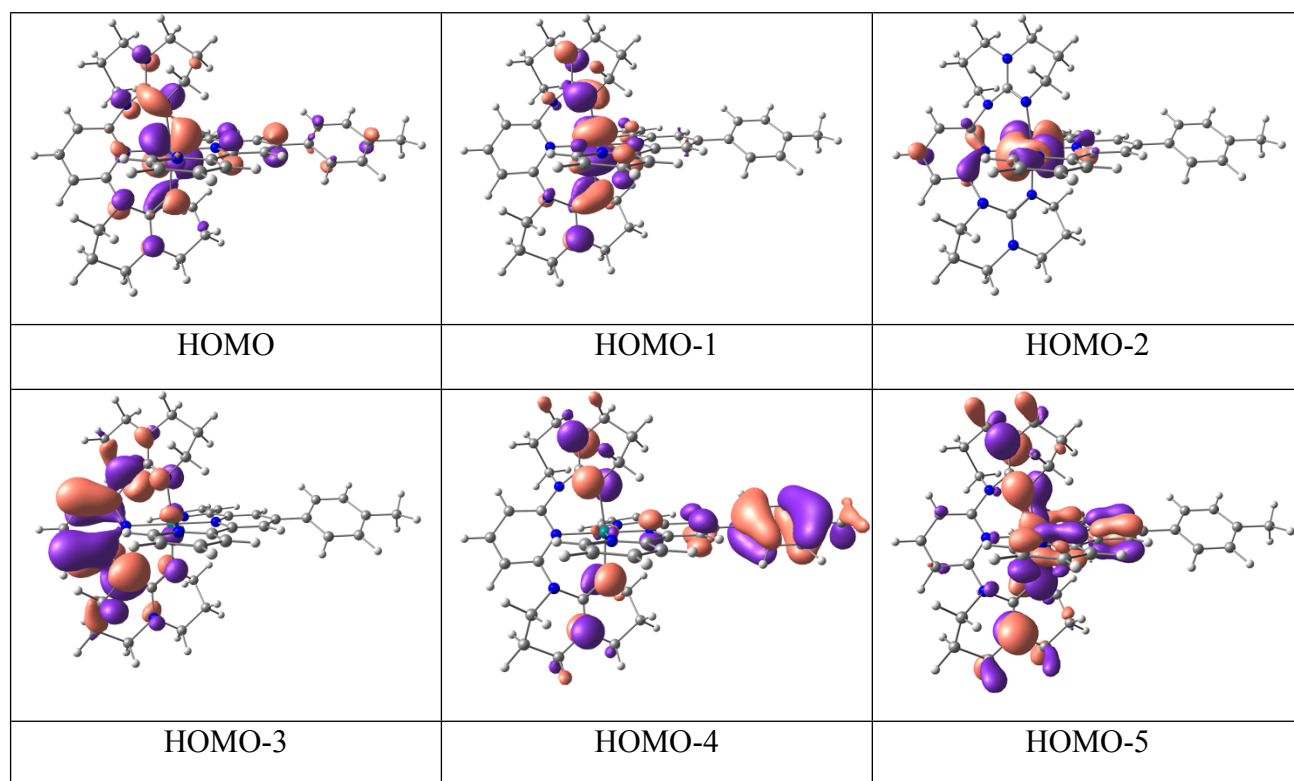

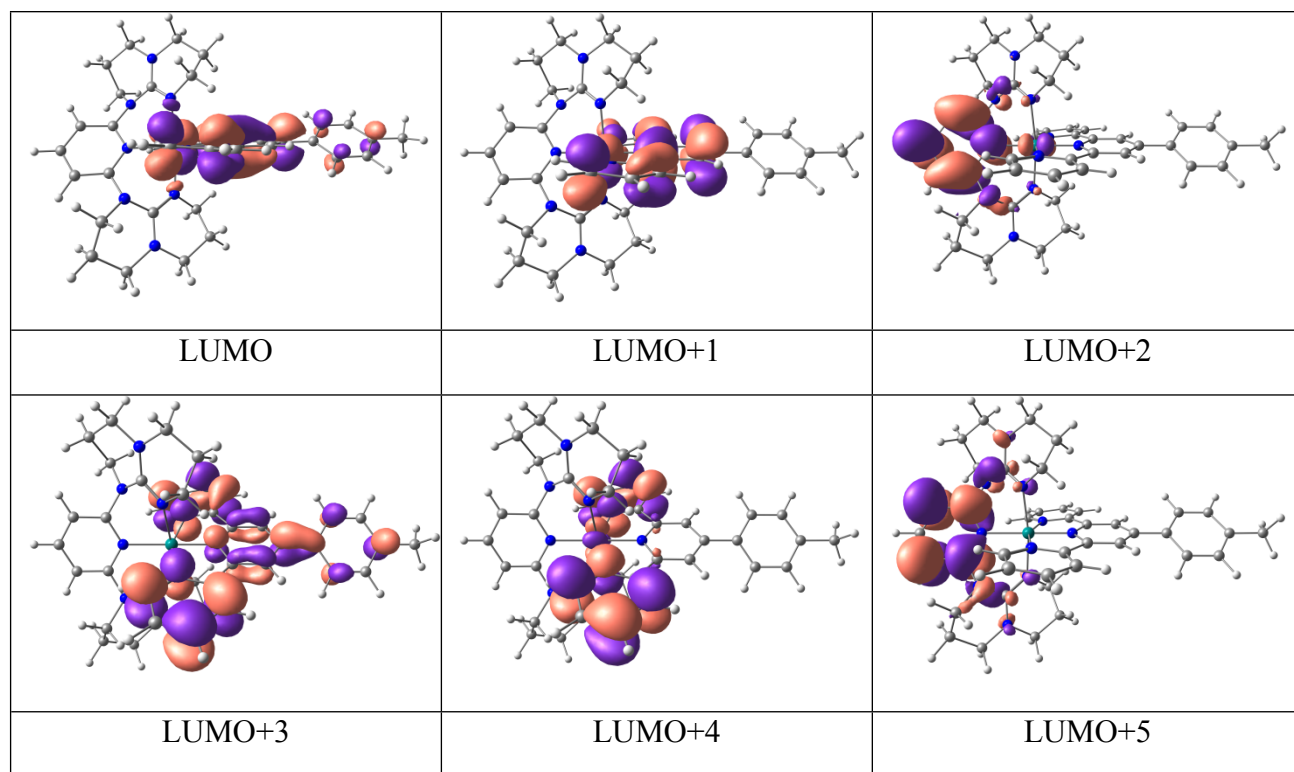

**Figure S4.** Kohn-Sham molecular orbital sketches for  $[2]^{2+}$  in ( $S=0$ ) ground state



**Table S6.** Selected transitions from TD-DFT calculations of [2]<sup>2+</sup> in the singlet ground state (b3lyp/LanL2DZ(f)[Ru]6-31G\*\*[C,H,N], CPCM (CH<sub>3</sub>CN)).

| state | energy (eV) | $\lambda/\text{nm}$ | $\lambda/\text{nm}$ ( $\epsilon \times 10^3 \text{ M}^{-1}\text{cm}^{-1}$ ) [expt.] | f      | Major transition(s)                                | Character                                                                                           |
|-------|-------------|---------------------|-------------------------------------------------------------------------------------|--------|----------------------------------------------------|-----------------------------------------------------------------------------------------------------|
| 59    | 5.04        | 246                 | 247 (39.7)                                                                          | 0.2134 | H-10->L+1 (46%)<br>H-5->L+3 (24%)                  | Tolyl-tpy( $\pi$ ) to Tolyl-tpy( $\pi^*$ ) (major) + hpp(n/ $\pi$ ) to Tolyl-tpy( $\pi^*$ ) (minor) |
| 41    | 4.44        | 279                 | 288 (45.1)                                                                          | 0.3339 | H-8->L+1 (41%),<br>H-7->L+1 (19%),<br>H-9->L (16%) | Tolyl-tpy( $\pi$ ) to Tolyl-tpy( $\pi^*$ ) (major) + hpp(n/ $\pi$ ) to Tolyl-tpy( $\pi^*$ ) (minor) |
| 32    | 4.06        | 305                 | 313 (27.9)                                                                          | 0.1566 | H-7->L (34%),<br>H-6->L+1 (33%),<br>H-8->L (20%)   | Tolyl-tpy( $\pi$ ) to Tolyl-tpy( $\pi^*$ ) (major) + hpp(n/ $\pi$ ) to Tolyl-tpy( $\pi^*$ ) (minor) |
| 10    | 3.31        | 375                 | 383 (11.3)                                                                          | 0.0631 | H->L+3 (93%)                                       | Ru(d $\pi$ ) to Tolyl-tpy( $\pi^*$ ) (major) + hpp(n/ $\pi$ ) to Tolyl-tpy( $\pi^*$ ) (minor)       |
| 2     | 2.19        | 565                 | 538 (9.4)                                                                           | 0.0485 | H->L (63%), H-1->L+1 (22%)                         | Ru(d $\pi$ ) to Tolyl-tpy( $\pi^*$ ) (major) + hpp(n/ $\pi$ ) to Tolyl-tpy( $\pi^*$ ) (minor)       |
| 1     | 2.00        | 620                 | 620 (6.2)                                                                           | 0.0119 | H-1->L (94%)                                       | Ru(d $\pi$ ) to Tolyl-tpy( $\pi^*$ ) (major) + hpp(n/ $\pi$ ) to Tolyl-tpy( $\pi^*$ ) (minor)       |

**Table S7.** MO composition of [3]<sup>2+</sup> in singlet (*S*=0) ground state (b3lyp/LanL2DZ(f)[Ru]6-31G\*\*[C,H,N,Br]).

| MO          | Energy (eV)  | Approximate Composition (%) |           |           |
|-------------|--------------|-----------------------------|-----------|-----------|
|             |              | Ru                          | Br-Ph-dpt | hpp       |
| LUMO+5      | -1.31        | 1                           | 96        | 3         |
| LUMO+4      | -1.44        | 3                           | 96        | 1         |
| LUMO+3      | -1.52        | 1                           | 3         | 94        |
| LUMO+2      | -1.80        | 1                           | 99        | 0         |
| LUMO+1      | -2.90        | 10                          | 87        | 3         |
| <b>LUMO</b> | <b>-2.99</b> | <b>2</b>                    | <b>97</b> | <b>1</b>  |
| <b>HOMO</b> | <b>-5.58</b> | <b>53</b>                   | <b>19</b> | <b>28</b> |
| HOMO-1      | -5.62        | 57                          | 9         | 34        |
| HOMO-2      | -6.09        | 81                          | 13        | 6         |
| HOMO-3      | -6.66        | 2                           | 1         | 97        |
| HOMO-4      | -6.81        | 5                           | 33        | 62        |
| HOMO-5      | -7.05        | 20                          | 17        | 63        |

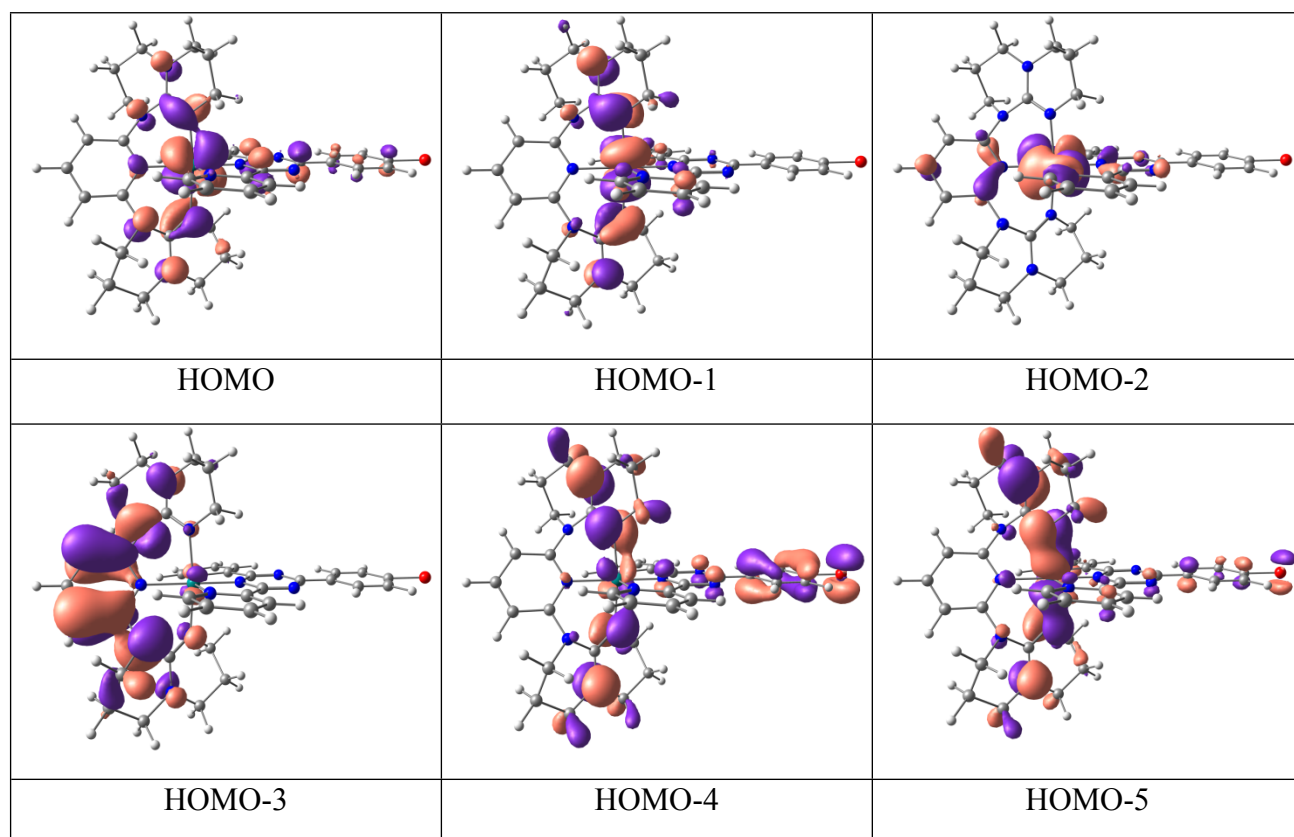

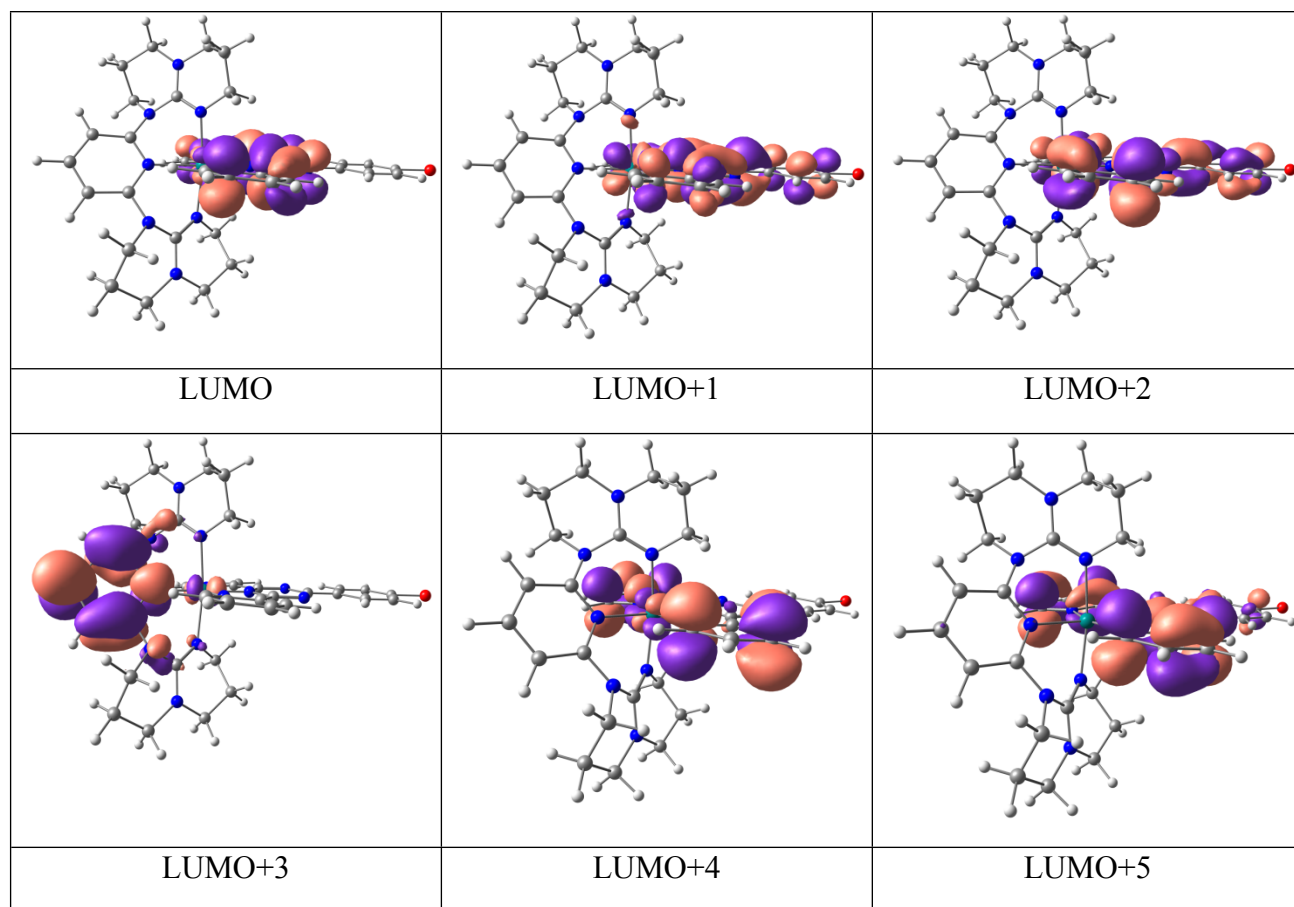

**Figure S5.** Kohn-Sham molecular orbital sketches for  $[3]^{2+}$  in ( $S=0$ ) ground state

**Table S8.** Selected transitions from TD-DFT calculations of [3]<sup>2+</sup> in the singlet ground state (b3lyp/LanL2DZ(f)[Ru], 6-31G\*\*[C,H,N,Br], CPCM (CH<sub>3</sub>CN)).

| state | energy (eV) | $\lambda/\text{nm}$ | $\lambda/\text{nm}$ ( $\epsilon \times 10^3 \text{ M}^{-1}\text{cm}^{-1}$ ) [expt.] | f      | Major transition(s)               | Character                                                                                   |
|-------|-------------|---------------------|-------------------------------------------------------------------------------------|--------|-----------------------------------|---------------------------------------------------------------------------------------------|
| 67    | 5.02        | 247                 | 244 (33.3)                                                                          | 0.0715 | H-1->L+12 (61%)                   | hpp (n/ $\pi$ ) to hpp (n/ $\pi^*$ )                                                        |
| 46    | 4.49        | 276                 | 291 (35.3)                                                                          | 0.2777 | H-11->L (49%),<br>H-10->L (17%)   | Br-Ph-dpt( $\pi$ ) to Br-Ph-dpt( $\pi^*$ )                                                  |
| 22    | 3.57        | 347                 | 380 (7.0)                                                                           | 0.3221 | H-2->L+2 (28%),<br>H-1->L+4 (34%) | Ru(d $\pi$ ) to Br-Ph-dpt( $\pi^*$ )(major) + hpp(n/ $\pi$ ) to Br-Ph-dpt( $\pi^*$ )(minor) |
| 8     | 3.15        | 394                 | 411 (8.6)                                                                           | 0.0985 | H->L+2 (93%)                      | Ru(d $\pi$ ) to Br-Ph-dpt( $\pi^*$ )(major) + hpp(n/ $\pi$ ) to Br-Ph-dpt( $\pi^*$ )(minor) |
| 6     | 2.38        | 520                 | 560 (11.8)                                                                          | 0.2337 | H-2->L+1 (44%),<br>H->L+1 (32%)   | Ru(d $\pi$ ) to Br-Ph-dpt( $\pi^*$ )(major) + hpp(n/ $\pi$ ) to Br-Ph-dpt( $\pi^*$ )(minor) |
| 1     | 1.84        | 675                 | 740 (3.8)                                                                           | 0.0017 | H-1->L+1 (47%),<br>H->L(44%)      | Ru(d $\pi$ ) to Br-Ph-dpt( $\pi^*$ )(major) + hpp(n/ $\pi$ ) to Br-Ph-dpt( $\pi^*$ )(minor) |

**Table S9.** MO composition of [4]<sup>2+</sup> in singlet (*S*=0) ground state (b3lyp/LanL2DZ(f)[Ru]6-31G\*\*[C,H,N]).

| MO          | Energy (eV)  | Approximate Composition (%) |                    |           |
|-------------|--------------|-----------------------------|--------------------|-----------|
|             |              | Ru                          | <i>t</i> Bu-Ph-Trz | hpp       |
| LUMO+5      | -1.23        | 1                           | 97                 | 1         |
| LUMO+4      | -1.38        | 3                           | 96                 | 1         |
| LUMO+3      | -1.51        | 3                           | 2                  | 95        |
| LUMO+2      | -1.71        | 1                           | 99                 | 1         |
| LUMO+1      | -2.85        | 12                          | 86                 | 3         |
| <b>LUMO</b> | <b>-2.98</b> | <b>3</b>                    | <b>97</b>          | <b>1</b>  |
| <b>HOMO</b> | <b>-5.5</b>  | <b>54</b>                   | <b>20</b>          | <b>25</b> |
| HOMO-1      | -5.53        | 59                          | 9                  | 32        |
| HOMO-2      | -5.99        | 81                          | 13                 | 6         |
| HOMO-3      | -6.69        | 3                           | 1                  | 96        |
| HOMO-4      | -6.79        | 4                           | 33                 | 64        |
| HOMO-5      | -7.04        | 19                          | 8                  | 72        |

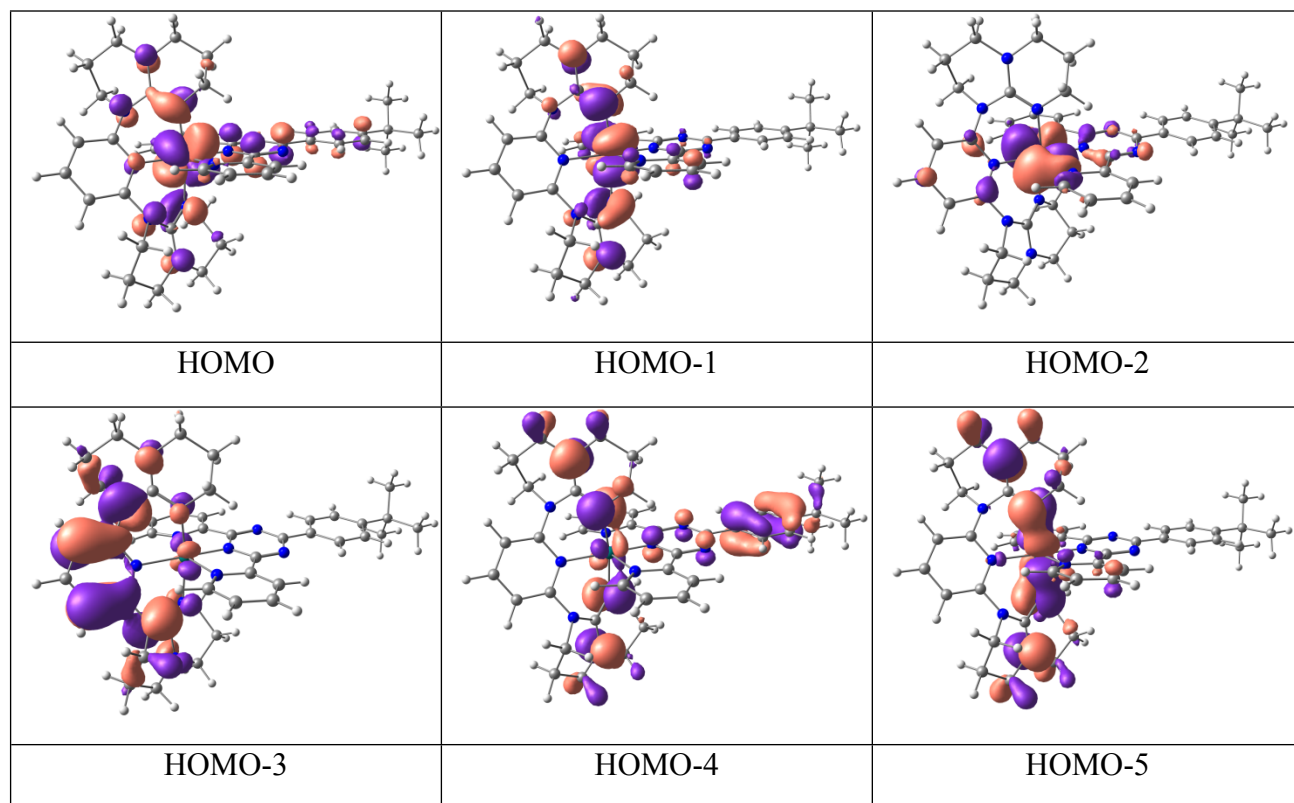

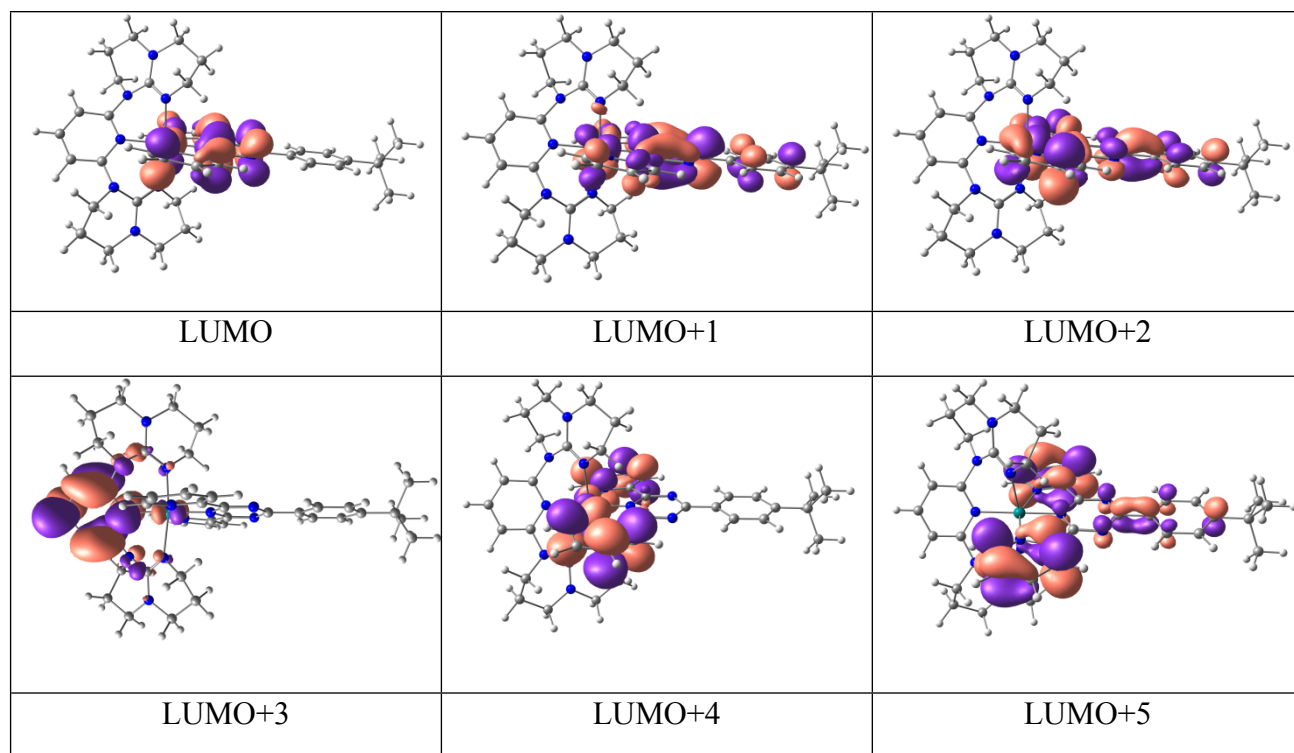

**Figure S6.** Kohn-Sham molecular orbital sketches for  $[4]^{2+}$  in ( $S=0$ ) ground state

**Table S10.** Selected transitions from TD-DFT calculations of [4]<sup>2+</sup> in the singlet ground state (b3lyp/LanL2DZ(f)[Ru], 6-31G\*\*[C,H,N], CPCM (CH<sub>3</sub>CN)).

| state | energy (eV) | $\lambda/\text{nm}$ | $\lambda/\text{nm}$ ( $\epsilon \times 10^3$ M <sup>-1</sup> cm <sup>-1</sup> ) [expt.] | f      | Major transition(s)                                  | Character                                                                                                             |
|-------|-------------|---------------------|-----------------------------------------------------------------------------------------|--------|------------------------------------------------------|-----------------------------------------------------------------------------------------------------------------------|
| 72    | 5.16        | 240                 | 243 (29.1)                                                                              | 0.1502 | H-4->L+6 (65%)                                       | hpp (n/ $\pi$ ) to hpp ( $\pi^*$ ) (major) + <sup>t</sup> Bu-Ph-dpt( $\pi$ ) to hpp ( $\pi^*$ ) (minor)               |
| 47    | 4.56        | 271                 | 288 (27.8)                                                                              | 0.2940 | H-11->L (76%)                                        | <sup>t</sup> Bu-Ph-dpt( $\pi$ ) to <sup>t</sup> Bu-Ph-dpt( $\pi^*$ )                                                  |
| 21    | 3.54        | 350                 | 373 (6.7)                                                                               | 0.3102 | H-2->L+2 (27%),<br>H-1->L+4 (27%),<br>H-2->L+3 (18%) | Ru(d $\pi$ ) to <sup>t</sup> Bu-Ph-dpt( $\pi^*$ ) (major) + hpp(n/ $\pi$ ) to <sup>t</sup> Bu-Ph-dpt( $\pi$ ) (minor) |
| 8     | 3.14        | 394                 | 405 (7.0)                                                                               | 0.1027 | H->L+2 (92%)                                         | Ru(d $\pi$ ) to <sup>t</sup> Bu-Ph-dpt( $\pi^*$ ) (major) + hpp(n/ $\pi$ ) to <sup>t</sup> Bu-Ph-dpt( $\pi$ ) (minor) |
| 6     | 2.37        | 523                 | 558 (9.3)                                                                               | 0.2879 | H->L+1 (37%),<br>H-2->L+1 (34%)                      | Ru(d $\pi$ ) to <sup>t</sup> Bu-Ph-dpt( $\pi^*$ ) (major) + hpp(n/ $\pi$ ) to <sup>t</sup> Bu-Ph-dpt( $\pi$ ) (minor) |
| 3     | 1.84        | 674                 | 740 (3.0)                                                                               | 0.0419 | H->L(53%),<br>H-1->L+1(41%)                          | Ru(d $\pi$ ) to <sup>t</sup> Bu-Ph-dpt( $\pi^*$ ) (major) + hpp(n/ $\pi$ ) to <sup>t</sup> Bu-Ph-dpt( $\pi$ ) (minor) |

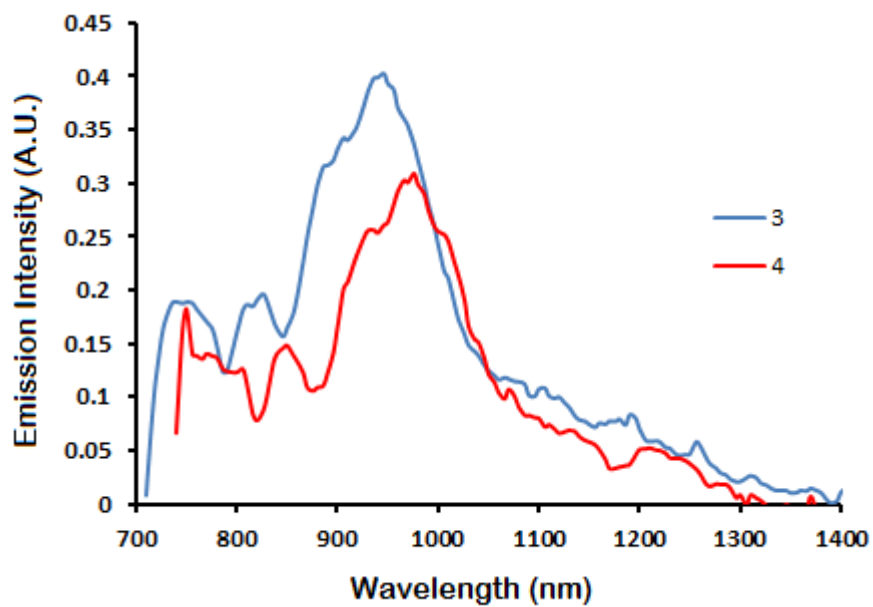

Figure S7. Corrected emission spectra of complexes **3** and **4** at 77 K in rigid butyronitrile matrix.

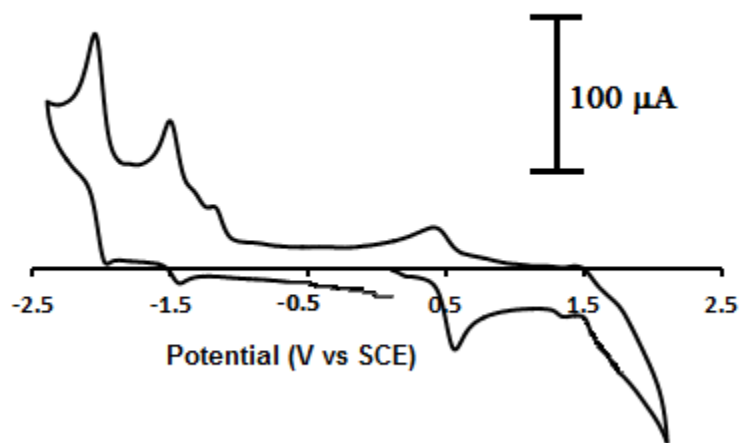

Figure S8. Cyclic voltammogram of the complex **1** in dry, degassed acetonitrile.



**Table S11.** Optimized Atomic coordinates obtained from DFT for [1]<sup>2+</sup> in singlet ground state (b3lyp/LanL2DZ(f)[Ru]6-31G\*\*[C,H,N]).

| Center Number | Atomic Number | Atomic Type | Coordinates (Angstroms) |           |           |
|---------------|---------------|-------------|-------------------------|-----------|-----------|
|               |               |             | X                       | Y         | Z         |
| 1             | 44            | 0           | -0.545664               | 0.000015  | 0.000029  |
| 2             | 7             | 0           | -0.125997               | -0.992801 | -1.835809 |
| 3             | 7             | 0           | 1.441919                | -0.000293 | 0.000095  |
| 4             | 7             | 0           | -0.125823               | 0.992635  | 1.835781  |
| 5             | 7             | 0           | -0.685039               | 1.879629  | -1.013404 |
| 6             | 7             | 0           | -1.557872               | 4.078253  | -1.035268 |
| 7             | 7             | 0           | -2.632296               | 2.381660  | 0.198591  |
| 8             | 7             | 0           | -2.658451               | 0.000291  | -0.000208 |
| 9             | 7             | 0           | -2.632879               | -2.381065 | -0.198906 |
| 10            | 7             | 0           | -1.559575               | -4.077736 | 1.035804  |
| 11            | 7             | 0           | -0.685736               | -1.879521 | 1.013545  |
| 12            | 6             | 0           | 1.215531                | -1.205606 | -2.029274 |
| 13            | 6             | 0           | 1.683070                | -1.874469 | -3.164219 |
| 14            | 1             | 0           | 2.745061                | -2.044867 | -3.295426 |
| 15            | 6             | 0           | 0.783095                | -2.310952 | -4.132485 |
| 16            | 1             | 0           | 1.137914                | -2.829022 | -5.017247 |
| 17            | 6             | 0           | -0.575421               | -2.054084 | -3.949415 |
| 18            | 1             | 0           | -1.311835               | -2.352853 | -4.687259 |
| 19            | 6             | 0           | -0.981762               | -1.397838 | -2.791368 |
| 20            | 1             | 0           | -2.026384               | -1.177505 | -2.609378 |
| 21            | 6             | 0           | 2.107587                | -0.628445 | -1.001251 |
| 22            | 6             | 0           | 3.500601                | -0.648214 | -1.013787 |
| 23            | 1             | 0           | 4.033544                | -1.176265 | -1.794746 |
| 24            | 6             | 0           | 4.232029                | -0.000458 | 0.000019  |
| 25            | 6             | 0           | 3.500739                | 0.647372  | 1.013878  |
| 26            | 1             | 0           | 4.033778                | 1.175389  | 1.794796  |
| 27            | 6             | 0           | 2.107723                | 0.627761  | 1.001416  |
| 28            | 6             | 0           | 1.215752                | 1.205071  | 2.029420  |
| 29            | 6             | 0           | 1.683342                | 1.873669  | 3.164492  |
| 30            | 1             | 0           | 2.745375                | 2.043705  | 3.295850  |
| 31            | 6             | 0           | 0.783382                | 2.310310  | 4.132703  |
| 32            | 1             | 0           | 1.138248                | 2.828196  | 5.017553  |
| 33            | 6             | 0           | -0.575185               | 2.053844  | 3.949446  |
| 34            | 1             | 0           | -1.311602               | 2.352737  | 4.687237  |
| 35            | 6             | 0           | -0.981583               | 1.397818  | 2.791295  |
| 36            | 1             | 0           | -2.026237               | 1.177782  | 2.609166  |
| 37            | 6             | 0           | 5.710344                | -0.000517 | -0.000054 |
| 38            | 6             | 0           | 6.427415                | 0.049301  | -1.209224 |
| 39            | 1             | 0           | 5.896264                | 0.124435  | -2.153750 |
| 40            | 6             | 0           | 7.820229                | 0.052787  | -1.207627 |
| 41            | 1             | 0           | 8.359749                | 0.105880  | -2.147907 |
| 42            | 6             | 0           | 8.520394                | -0.000641 | -0.000197 |
| 43            | 1             | 0           | 9.605732                | -0.000690 | -0.000255 |
| 44            | 6             | 0           | 7.820349                | -0.054003 | 1.207305  |

|    |   |   |           |           |           |
|----|---|---|-----------|-----------|-----------|
| 45 | 1 | 0 | 8.359957  | -0.107143 | 2.147531  |
| 46 | 6 | 0 | 6.427534  | -0.050395 | 1.209041  |
| 47 | 1 | 0 | 5.896471  | -0.125471 | 2.153621  |
| 48 | 6 | 0 | -3.348245 | 1.170337  | 0.050467  |
| 49 | 6 | 0 | -4.747245 | 1.198068  | 0.013790  |
| 50 | 1 | 0 | -5.279232 | 2.138914  | -0.009551 |
| 51 | 6 | 0 | -5.449020 | 0.000742  | -0.001062 |
| 52 | 1 | 0 | -6.534046 | 0.000896  | -0.001430 |
| 53 | 6 | 0 | -4.747612 | -1.196815 | -0.015457 |
| 54 | 1 | 0 | -5.279963 | -2.137458 | 0.007572  |
| 55 | 6 | 0 | -3.348583 | -1.169566 | -0.051243 |
| 56 | 6 | 0 | -3.271660 | -3.476228 | -0.959430 |
| 57 | 1 | 0 | -2.518399 | -3.898114 | -1.636251 |
| 58 | 1 | 0 | -4.058349 | -3.050662 | -1.581165 |
| 59 | 6 | 0 | -3.784006 | -4.545603 | -0.004833 |
| 60 | 1 | 0 | -4.512594 | -4.112064 | 0.687692  |
| 61 | 1 | 0 | -4.283864 | -5.355724 | -0.543260 |
| 62 | 6 | 0 | -2.583733 | -5.099862 | 0.752223  |
| 63 | 1 | 0 | -2.893187 | -5.553467 | 1.700507  |
| 64 | 1 | 0 | -2.102096 | -5.888222 | 0.159208  |
| 65 | 6 | 0 | -0.391239 | -4.570924 | 1.779657  |
| 66 | 1 | 0 | 0.423413  | -4.814073 | 1.083522  |
| 67 | 1 | 0 | -0.683072 | -5.496891 | 2.279690  |
| 68 | 6 | 0 | 0.040204  | -3.511660 | 2.781920  |
| 69 | 1 | 0 | -0.760307 | -3.359666 | 3.514395  |
| 70 | 1 | 0 | 0.930867  | -3.833960 | 3.328886  |
| 71 | 6 | 0 | 0.331589  | -2.222815 | 2.021853  |
| 72 | 1 | 0 | 0.414511  | -1.386817 | 2.720554  |
| 73 | 1 | 0 | 1.299327  | -2.306988 | 1.512104  |
| 74 | 6 | 0 | -1.584556 | -2.765697 | 0.660654  |
| 75 | 6 | 0 | -3.271059 | 3.476777  | 0.959209  |
| 76 | 1 | 0 | -2.518006 | 3.898102  | 1.636619  |
| 77 | 1 | 0 | -4.058266 | 3.051268  | 1.580322  |
| 78 | 6 | 0 | -3.782431 | 4.546739  | 0.004756  |
| 79 | 1 | 0 | -4.282251 | 5.356848  | 0.543233  |
| 80 | 1 | 0 | -4.510812 | 4.113789  | -0.688361 |
| 81 | 6 | 0 | -2.581520 | 5.100802  | -0.751417 |
| 82 | 1 | 0 | -2.890331 | 5.555206  | -1.699527 |
| 83 | 1 | 0 | -2.099683 | 5.888518  | -0.157691 |
| 84 | 6 | 0 | -0.389181 | 4.571063  | -1.778811 |
| 85 | 1 | 0 | 0.425486  | 4.813658  | -1.082502 |
| 86 | 1 | 0 | -0.680501 | 5.497293  | -2.278662 |
| 87 | 6 | 0 | 0.041902  | 3.511833  | -2.781274 |
| 88 | 1 | 0 | -0.758605 | 3.360364  | -3.513858 |
| 89 | 1 | 0 | 0.932764  | 3.833862  | -3.328076 |
| 90 | 6 | 0 | 0.332619  | 2.222704  | -2.021441 |
| 91 | 1 | 0 | 0.415327  | 1.386798  | -2.720289 |
| 92 | 1 | 0 | 1.300305  | 2.306385  | -1.511509 |
| 93 | 6 | 0 | -1.583561 | 2.766106  | -0.660472 |

---

**Table S12.** Optimized Atomic coordinates obtained from DFT for [2]<sup>2+</sup> in singlet ground state (b3lyp/LanL2DZ(f)[Ru]6-31G\*\*[C,H,N]).

| Center Number | Atomic Number | Atomic Type | Coordinates (Angstroms) |           |           |
|---------------|---------------|-------------|-------------------------|-----------|-----------|
|               |               |             | X                       | Y         | Z         |
| 1             | 44            | 0           | -0.773882               | -0.000117 | -0.000185 |
| 2             | 7             | 0           | -0.353309               | 1.045790  | -1.804878 |
| 3             | 7             | 0           | 1.212502                | -0.000742 | 0.000247  |
| 4             | 7             | 0           | -0.354649               | -1.046556 | 1.804631  |
| 5             | 7             | 0           | -0.930902               | -1.820646 | -1.102864 |
| 6             | 7             | 0           | -1.765263               | -4.027989 | -1.185942 |
| 7             | 7             | 0           | -2.863072               | -2.389806 | 0.106542  |
| 8             | 7             | 0           | -2.888895               | 0.000857  | -0.000872 |
| 9             | 7             | 0           | -2.860725               | 2.391500  | -0.107928 |
| 10            | 7             | 0           | -1.763712               | 4.027834  | 1.187598  |
| 11            | 7             | 0           | -0.929779               | 1.820369  | 1.102590  |
| 12            | 6             | 0           | 0.988375                | 1.255556  | -1.997969 |
| 13            | 6             | 0           | 1.456820                | 1.940963  | -3.122848 |
| 14            | 1             | 0           | 2.519565                | 2.105878  | -3.254841 |
| 15            | 6             | 0           | 0.556830                | 2.399774  | -4.080312 |
| 16            | 1             | 0           | 0.912178                | 2.930095  | -4.957574 |
| 17            | 6             | 0           | -0.802991               | 2.150107  | -3.896221 |
| 18            | 1             | 0           | -1.540007               | 2.468223  | -4.625317 |
| 19            | 6             | 0           | -1.209580               | 1.475090  | -2.749492 |
| 20            | 1             | 0           | -2.255237               | 1.259865  | -2.567370 |
| 21            | 6             | 0           | 1.880313                | 0.660004  | -0.979374 |
| 22            | 6             | 0           | 3.273095                | 0.673983  | -0.994832 |
| 23            | 1             | 0           | 3.805360                | 1.175366  | -1.793459 |
| 24            | 6             | 0           | 4.006324                | -0.000490 | 0.001486  |
| 25            | 6             | 0           | 3.272375                | -0.675225 | 0.997068  |
| 26            | 1             | 0           | 3.803925                | -1.176270 | 1.796364  |
| 27            | 6             | 0           | 1.879570                | -0.661469 | 0.980353  |
| 28            | 6             | 0           | 0.986853                | -1.256936 | 1.998333  |
| 29            | 6             | 0           | 1.454450                | -1.942898 | 3.123226  |
| 30            | 1             | 0           | 2.517053                | -2.108367 | 3.255659  |
| 31            | 6             | 0           | 0.553794                | -2.401611 | 4.080114  |
| 32            | 1             | 0           | 0.908487                | -2.932341 | 4.957395  |
| 33            | 6             | 0           | -0.805832               | -2.151346 | 3.895410  |
| 34            | 1             | 0           | -1.543344               | -2.469381 | 4.624037  |
| 35            | 6             | 0           | -1.211568               | -1.475835 | 2.748664  |
| 36            | 1             | 0           | -2.257051               | -1.260187 | 2.566042  |
| 37            | 6             | 0           | 5.481594                | 0.000008  | 0.001769  |
| 38            | 6             | 0           | 6.205040                | 1.113056  | -0.463481 |
| 39            | 1             | 0           | 5.680143                | 2.004407  | -0.795455 |
| 40            | 6             | 0           | 7.595759                | 1.112925  | -0.454418 |
| 41            | 1             | 0           | 8.130408                | 1.992723  | -0.801054 |
| 42            | 6             | 0           | 8.320880                | 0.003373  | 0.006225  |
| 43            | 6             | 0           | 7.596793                | -1.106374 | 0.468847  |
| 44            | 1             | 0           | 8.132579                | -1.981420 | 0.825841  |

|    |   |   |           |           |           |
|----|---|---|-----------|-----------|-----------|
| 45 | 6 | 0 | 6.206298  | -1.110764 | 0.471117  |
| 46 | 1 | 0 | 5.682418  | -2.000836 | 0.808083  |
| 47 | 6 | 0 | 9.827812  | -0.006635 | -0.017133 |
| 48 | 1 | 0 | 10.196953 | -0.431961 | -0.958499 |
| 49 | 1 | 0 | 10.237693 | -0.612499 | 0.795453  |
| 50 | 1 | 0 | 10.237157 | 1.003462  | 0.066522  |
| 51 | 6 | 0 | 0.016728  | -2.196546 | -2.160827 |
| 52 | 1 | 0 | 0.814547  | -1.457387 | -2.192127 |
| 53 | 1 | 0 | -0.485588 | -2.171279 | -3.138343 |
| 54 | 6 | 0 | 0.576047  | -3.590952 | -1.894803 |
| 55 | 1 | 0 | 1.296597  | -3.886591 | -2.662673 |
| 56 | 1 | 0 | 1.097816  | -3.594226 | -0.931640 |
| 57 | 6 | 0 | -0.584373 | -4.574456 | -1.882151 |
| 58 | 1 | 0 | -0.304718 | -5.512157 | -1.387604 |
| 59 | 1 | 0 | -0.883440 | -4.827745 | -2.907350 |
| 60 | 6 | 0 | -2.839823 | -5.028115 | -1.044947 |
| 61 | 1 | 0 | -2.403986 | -5.891521 | -0.526788 |
| 62 | 1 | 0 | -3.133048 | -5.370857 | -2.044679 |
| 63 | 6 | 0 | -4.041781 | -4.511827 | -0.261207 |
| 64 | 1 | 0 | -4.563182 | -5.351721 | 0.206444  |
| 65 | 1 | 0 | -4.754394 | -4.012789 | -0.925058 |
| 66 | 6 | 0 | -3.521302 | -3.528395 | 0.780244  |
| 67 | 1 | 0 | -4.304586 | -3.141588 | 1.430803  |
| 68 | 1 | 0 | -2.776433 | -4.012338 | 1.423131  |
| 69 | 6 | 0 | -1.812142 | -2.730000 | -0.766373 |
| 70 | 6 | 0 | -3.579072 | -1.170789 | 0.007742  |
| 71 | 6 | 0 | -4.978255 | -1.195712 | -0.027071 |
| 72 | 1 | 0 | -5.513725 | -2.132873 | -0.080945 |
| 73 | 6 | 0 | -5.678451 | 0.002086  | -0.003343 |
| 74 | 1 | 0 | -6.763459 | 0.002575  | -0.004325 |
| 75 | 6 | 0 | -4.977240 | 1.199255  | 0.021691  |
| 76 | 1 | 0 | -5.512037 | 2.136847  | 0.074634  |
| 77 | 6 | 0 | -3.577993 | 1.173136  | -0.010573 |
| 78 | 6 | 0 | -3.517080 | 3.531128  | -0.781678 |
| 79 | 1 | 0 | -4.299534 | 3.145479  | -1.433925 |
| 80 | 1 | 0 | -2.770797 | 4.015124  | -1.422871 |
| 81 | 6 | 0 | -4.038573 | 4.513985  | 0.259807  |
| 82 | 1 | 0 | -4.558586 | 5.354691  | -0.207932 |
| 83 | 1 | 0 | -4.752636 | 4.014886  | 0.922042  |
| 84 | 6 | 0 | -2.837515 | 5.028690  | 1.045974  |
| 85 | 1 | 0 | -2.400354 | 5.892391  | 0.529417  |
| 86 | 1 | 0 | -3.132091 | 5.370554  | 2.045608  |
| 87 | 6 | 0 | -0.583543 | 4.573108  | 1.885947  |
| 88 | 1 | 0 | -0.883669 | 4.824863  | 2.911213  |
| 89 | 1 | 0 | -0.303262 | 5.511538  | 1.393144  |
| 90 | 6 | 0 | 0.576756  | 3.589491  | 1.898240  |
| 91 | 1 | 0 | 1.296609  | 3.883908  | 2.667230  |
| 92 | 1 | 0 | 1.099444  | 3.594182  | 0.935581  |
| 93 | 6 | 0 | 0.017166  | 2.194738  | 2.161743  |
| 94 | 1 | 0 | 0.814989  | 1.455572  | 2.192443  |
| 95 | 1 | 0 | -0.485796 | 2.167973  | 3.138885  |
| 96 | 6 | 0 | -1.810482 | 2.730351  | 0.766411  |

**Table S13.** Optimized Atomic coordinates obtained from DFT for [3]<sup>2+</sup> in singlet ground state (b3lyp/LanL2DZ(f)[Ru]6-31G\*\*[C,H,N]).

| Center Number | Atomic Number | Atomic Type | Coordinates (Angstroms) |           |           |
|---------------|---------------|-------------|-------------------------|-----------|-----------|
|               |               |             | X                       | Y         | Z         |
| 1             | 35            | 0           | -8.898623               | 0.103425  | -0.209417 |
| 2             | 44            | 0           | 1.308804                | 0.055589  | 0.023965  |
| 3             | 7             | 0           | 0.882670                | 1.153329  | 1.770456  |
| 4             | 7             | 0           | -0.601138               | -0.063705 | 0.097415  |
| 5             | 7             | 0           | -2.634610               | 0.526029  | 1.129263  |
| 6             | 7             | 0           | -2.603097               | -0.967413 | -0.746190 |
| 7             | 7             | 0           | 0.913819                | -1.113919 | -1.646515 |
| 8             | 7             | 0           | 3.376583                | 0.133682  | -0.029054 |
| 9             | 7             | 0           | 3.417803                | -2.244492 | -0.152888 |
| 10            | 7             | 0           | 2.233499                | -3.933336 | 0.936518  |
| 11            | 7             | 0           | 1.568613                | -1.695710 | 1.139283  |
| 12            | 7             | 0           | 3.273680                | 2.495388  | -0.009990 |
| 13            | 7             | 0           | 2.126387                | 3.953522  | -1.425759 |
| 14            | 7             | 0           | 1.348826                | 1.767836  | -1.126022 |
| 15            | 6             | 0           | -0.392048               | -1.561817 | -1.682270 |
| 16            | 6             | 0           | -0.805765               | -2.555992 | -2.557942 |
| 17            | 1             | 0           | -1.683897               | -2.868187 | -2.545668 |
| 18            | 6             | 0           | 0.119719                | -3.071196 | -3.450438 |
| 19            | 1             | 0           | -0.119827               | -3.769065 | -4.019013 |
| 20            | 6             | 0           | 1.394721                | -2.551415 | -3.496755 |
| 21            | 1             | 0           | 2.005189                | -2.857575 | -4.129235 |
| 22            | 6             | 0           | 1.752690                | -1.571090 | -2.591401 |
| 23            | 1             | 0           | 2.611157                | -1.211696 | -2.638342 |
| 24            | 6             | 0           | -1.281810               | -0.877530 | -0.747135 |
| 25            | 6             | 0           | -3.242679               | -0.228328 | 0.189115  |
| 26            | 6             | 0           | -1.313427               | 0.587166  | 1.057634  |
| 27            | 6             | 0           | -0.459122               | 1.289945  | 2.004005  |
| 28            | 6             | 0           | -0.961387               | 1.978024  | 3.106358  |
| 29            | 1             | 0           | -1.880153               | 2.070517  | 3.229003  |
| 30            | 6             | 0           | -0.072303               | 2.516716  | 4.012757  |
| 31            | 1             | 0           | -0.380702               | 2.993310  | 4.751368  |
| 32            | 6             | 0           | 1.278356                | 2.338686  | 3.808242  |
| 33            | 1             | 0           | 1.892288                | 2.664164  | 4.428773  |
| 34            | 6             | 0           | 1.714461                | 1.679232  | 2.681047  |
| 35            | 1             | 0           | 2.632773                | 1.593008  | 2.544834  |
| 36            | 6             | 0           | -4.704502               | -0.195703 | 0.142200  |
| 37            | 6             | 0           | -5.394090               | -0.833951 | -0.865662 |
| 38            | 1             | 0           | -4.930391               | -1.351959 | -1.485478 |
| 39            | 6             | 0           | -6.753920               | -0.703831 | -0.949398 |
| 40            | 1             | 0           | -7.234669               | -1.106479 | -1.635366 |
| 41            | 6             | 0           | -7.381296               | 0.007593  | -0.042830 |
| 42            | 6             | 0           | -6.788352               | 0.638762  | 0.946402  |

|    |   |   |           |           |           |
|----|---|---|-----------|-----------|-----------|
| 43 | 1 | 0 | -7.291626 | 1.135531  | 1.549012  |
| 44 | 6 | 0 | -5.422445 | 0.548208  | 1.065132  |
| 45 | 1 | 0 | -4.978551 | 0.980010  | 1.759044  |
| 46 | 6 | 0 | 0.615913  | -2.086949 | 2.178216  |
| 47 | 1 | 0 | 0.643216  | -1.409637 | 2.873944  |
| 48 | 1 | 0 | -0.271833 | -2.060527 | 1.789506  |
| 49 | 6 | 0 | 0.777927  | -3.336172 | 2.792611  |
| 50 | 1 | 0 | -0.019002 | -3.568444 | 3.297181  |
| 51 | 1 | 0 | 1.533614  | -3.315012 | 3.402444  |
| 52 | 6 | 0 | 1.031747  | -4.417178 | 1.631963  |
| 53 | 1 | 0 | 1.182985  | -5.300170 | 2.007859  |
| 54 | 1 | 0 | 0.275857  | -4.457485 | 1.025356  |
| 55 | 6 | 0 | 3.371903  | -4.885711 | 0.805409  |
| 56 | 1 | 0 | 3.735819  | -5.052968 | 1.690045  |
| 57 | 1 | 0 | 3.027596  | -5.729725 | 0.468396  |
| 58 | 6 | 0 | 4.445308  | -4.454260 | -0.055251 |
| 59 | 1 | 0 | 4.718580  | -5.202272 | -0.610627 |
| 60 | 1 | 0 | 5.204367  | -4.203051 | 0.495060  |
| 61 | 6 | 0 | 4.090638  | -3.305011 | -0.937045 |
| 62 | 1 | 0 | 4.894572  | -2.947000 | -1.344664 |
| 63 | 1 | 0 | 3.500087  | -3.608767 | -1.645966 |
| 64 | 6 | 0 | 2.371378  | -2.620085 | 0.672773  |
| 65 | 6 | 0 | 4.097865  | -1.010613 | -0.001865 |
| 66 | 6 | 0 | 5.474016  | -1.009657 | 0.138306  |
| 67 | 1 | 0 | 5.943378  | -1.811247 | 0.191160  |
| 68 | 6 | 0 | 6.139175  | 0.191518  | 0.198975  |
| 69 | 1 | 0 | 7.062839  | 0.211559  | 0.305555  |
| 70 | 6 | 0 | 5.421719  | 1.372523  | 0.100376  |
| 71 | 1 | 0 | 5.862218  | 2.192269  | 0.105531  |
| 72 | 6 | 0 | 4.040633  | 1.317942  | -0.005215 |
| 73 | 6 | 0 | 3.886122  | 3.729815  | 0.508128  |
| 74 | 1 | 0 | 4.612791  | 3.507235  | 1.111351  |
| 75 | 1 | 0 | 3.226557  | 4.242746  | 1.001915  |
| 76 | 6 | 0 | 4.411137  | 4.548745  | -0.649710 |
| 77 | 1 | 0 | 4.840791  | 5.354889  | -0.319833 |
| 78 | 1 | 0 | 5.065774  | 4.036561  | -1.151758 |
| 79 | 6 | 0 | 3.244073  | 4.908674  | -1.532926 |
| 80 | 1 | 0 | 2.926347  | 5.793330  | -1.292678 |
| 81 | 1 | 0 | 3.543994  | 4.941326  | -2.455385 |
| 82 | 6 | 0 | 0.914620  | 4.411969  | -2.102965 |
| 83 | 1 | 0 | 1.113883  | 4.568367  | -3.040205 |
| 84 | 1 | 0 | 0.632595  | 5.255287  | -1.713711 |
| 85 | 6 | 0 | -0.212133 | 3.415079  | -1.995121 |
| 86 | 1 | 0 | -0.881419 | 3.594172  | -2.674871 |
| 87 | 1 | 0 | -0.633614 | 3.483152  | -1.123428 |
| 88 | 6 | 0 | 0.367941  | 2.029819  | -2.186858 |
| 89 | 1 | 0 | -0.341468 | 1.366937  | -2.151511 |
| 90 | 1 | 0 | 0.797807  | 1.969682  | -3.055355 |
| 91 | 6 | 0 | 2.207093  | 2.721563  | -0.901318 |

---

**Table S14.** Optimized Atomic coordinates obtained from DFT for [4]<sup>2+</sup> in singlet ground state (b3lyp/LanL2DZ(f)[Ru]6-31G\*\*[C,H,N]).

| Center Number | Atomic Number | Atomic Type | Coordinates (Angstroms) |           |           |
|---------------|---------------|-------------|-------------------------|-----------|-----------|
|               |               |             | X                       | Y         | Z         |
| 1             | 44            | 0           | -1.348493               | 0.000183  | 0.000581  |
| 2             | 7             | 0           | -0.888845               | -1.079414 | 1.805836  |
| 3             | 7             | 0           | 0.626580                | -0.004275 | 0.005955  |
| 4             | 7             | 0           | -0.873940               | 1.077575  | -1.802426 |
| 5             | 7             | 0           | -1.505872               | 1.810089  | 1.118981  |
| 6             | 7             | 0           | -2.335143               | 4.018621  | 1.212590  |
| 7             | 7             | 0           | -3.422842               | 2.394636  | -0.107689 |
| 8             | 7             | 0           | -3.461086               | 0.005110  | -0.006121 |
| 9             | 7             | 0           | -3.435034               | -2.384529 | 0.096563  |
| 10            | 7             | 0           | -2.342875               | -4.015666 | -1.211278 |
| 11            | 7             | 0           | -1.507773               | -1.809496 | -1.118164 |
| 12            | 6             | 0           | 0.458186                | -1.271899 | 1.986673  |
| 13            | 6             | 0           | 0.976348                | -1.950228 | 3.088527  |
| 14            | 1             | 0           | 2.051122                | -2.066425 | 3.168695  |
| 15            | 6             | 0           | 0.102336                | -2.441409 | 4.055672  |
| 16            | 1             | 0           | 0.480175                | -2.971399 | 4.923658  |
| 17            | 6             | 0           | -1.265623               | -2.222552 | 3.890473  |
| 18            | 1             | 0           | -1.982946               | -2.568064 | 4.627080  |
| 19            | 6             | 0           | -1.715504               | -1.543035 | 2.759110  |
| 20            | 1             | 0           | -2.770423               | -1.354499 | 2.601701  |
| 21            | 6             | 0           | 1.325554                | -0.653542 | 0.964003  |
| 22            | 7             | 0           | 2.644104                | -0.686729 | 0.998612  |
| 23            | 6             | 0           | 3.299855                | -0.010804 | 0.013147  |
| 24            | 7             | 0           | 2.652683                | 0.668238  | -0.975731 |
| 25            | 6             | 0           | 1.333671                | 0.641458  | -0.948197 |
| 26            | 6             | 0           | 0.474959                | 1.263890  | -1.975632 |
| 27            | 6             | 0           | 1.002479                | 1.939866  | -3.074487 |
| 28            | 1             | 0           | 2.078211                | 2.051091  | -3.148553 |
| 29            | 6             | 0           | 0.136213                | 2.435057  | -4.046529 |
| 30            | 1             | 0           | 0.521357                | 2.963396  | -4.912308 |
| 31            | 6             | 0           | -1.233637               | 2.222351  | -3.889159 |
| 32            | 1             | 0           | -1.945177               | 2.571121  | -4.629827 |
| 33            | 6             | 0           | -1.693040               | 1.544845  | -2.760414 |
| 34            | 1             | 0           | -2.749695               | 1.361035  | -2.609097 |
| 35            | 6             | 0           | 4.756211                | -0.013801 | 0.016509  |
| 36            | 6             | 0           | 5.473891                | -0.695710 | 1.016920  |
| 37            | 1             | 0           | 4.932934                | -1.224165 | 1.793151  |
| 38            | 6             | 0           | 6.863208                | -0.694925 | 1.015749  |
| 39            | 1             | 0           | 7.380241                | -1.230364 | 1.802273  |
| 40            | 6             | 0           | 7.598935                | -0.019935 | 0.025162  |
| 41            | 6             | 0           | 6.866833                | 0.659104  | -0.971739 |
| 42            | 1             | 0           | 7.395571                | 1.192362  | -1.754305 |
| 43            | 6             | 0           | 5.482097                | 0.667230  | -0.983168 |
| 44            | 1             | 0           | 4.946587                | 1.197577  | -1.761743 |

|    |   |   |           |           |           |
|----|---|---|-----------|-----------|-----------|
| 45 | 6 | 0 | 9.133435  | -0.000104 | -0.004300 |
| 46 | 6 | 0 | 9.753916  | -0.790021 | 1.163408  |
| 47 | 1 | 0 | 9.470620  | -1.847476 | 1.140516  |
| 48 | 1 | 0 | 9.470523  | -0.375419 | 2.136445  |
| 49 | 1 | 0 | 10.844453 | -0.743896 | 1.095332  |
| 50 | 6 | 0 | 9.621733  | -0.627504 | -1.334174 |
| 51 | 1 | 0 | 10.715623 | -0.616684 | -1.368716 |
| 52 | 1 | 0 | 9.258479  | -0.078030 | -2.207625 |
| 53 | 1 | 0 | 9.291054  | -1.666942 | -1.426656 |
| 54 | 6 | 0 | 9.622284  | 1.467496  | 0.082643  |
| 55 | 1 | 0 | 10.716167 | 1.495622  | 0.059159  |
| 56 | 1 | 0 | 9.292093  | 1.939533  | 1.013471  |
| 57 | 1 | 0 | 9.258506  | 2.074037  | -0.751937 |
| 58 | 6 | 0 | -0.565648 | -2.179163 | -2.183230 |
| 59 | 1 | 0 | 0.231381  | -1.438930 | -2.216750 |
| 60 | 1 | 0 | -1.072855 | -2.147802 | -3.157978 |
| 61 | 6 | 0 | -0.004025 | -3.574763 | -1.928654 |
| 62 | 1 | 0 | 0.712211  | -3.865296 | -2.702377 |
| 63 | 1 | 0 | 0.523660  | -3.585269 | -0.968711 |
| 64 | 6 | 0 | -1.164398 | -4.558335 | -1.915695 |
| 65 | 1 | 0 | -1.468636 | -4.806458 | -2.940531 |
| 66 | 1 | 0 | -0.882290 | -5.498192 | -1.426931 |
| 67 | 6 | 0 | -3.416331 | -5.017349 | -1.070426 |
| 68 | 1 | 0 | -2.979194 | -5.881188 | -0.554163 |
| 69 | 1 | 0 | -3.709858 | -5.358254 | -2.070598 |
| 70 | 6 | 0 | -4.617797 | -4.502878 | -0.285209 |
| 71 | 1 | 0 | -5.141147 | -5.344267 | 0.177499  |
| 72 | 1 | 0 | -5.328851 | -3.999096 | -0.947135 |
| 73 | 6 | 0 | -4.096264 | -3.526342 | 0.762267  |
| 74 | 1 | 0 | -4.879126 | -3.141826 | 1.414776  |
| 75 | 1 | 0 | -3.352694 | -4.015928 | 1.402370  |
| 76 | 6 | 0 | -2.388154 | -2.721339 | -0.783205 |
| 77 | 6 | 0 | -4.152183 | -1.165367 | -0.000988 |
| 78 | 6 | 0 | -5.551069 | -1.187947 | -0.039609 |
| 79 | 1 | 0 | -6.088501 | -2.123948 | -0.094044 |
| 80 | 6 | 0 | -6.248702 | 0.011611  | -0.019727 |
| 81 | 1 | 0 | -7.333692 | 0.014176  | -0.025108 |
| 82 | 6 | 0 | -5.545705 | 1.207886  | 0.007169  |
| 83 | 1 | 0 | -6.079430 | 2.146284  | 0.056353  |
| 84 | 6 | 0 | -4.146580 | 1.178886  | -0.017596 |
| 85 | 6 | 0 | -4.073027 | 3.540753  | -0.776799 |
| 86 | 1 | 0 | -4.851230 | 3.161242  | -1.437771 |
| 87 | 1 | 0 | -3.321293 | 4.028720  | -1.408513 |
| 88 | 6 | 0 | -4.600318 | 4.516985  | 0.268073  |
| 89 | 1 | 0 | -5.115546 | 5.361778  | -0.197540 |
| 90 | 1 | 0 | -5.319890 | 4.014750  | 0.921893  |
| 91 | 6 | 0 | -3.404194 | 5.024250  | 1.066141  |
| 92 | 1 | 0 | -2.959489 | 5.888671  | 0.557374  |
| 93 | 1 | 0 | -3.705610 | 5.362164  | 2.064988  |
| 94 | 6 | 0 | -1.161256 | 4.555027  | 1.929246  |
| 95 | 1 | 0 | -0.873526 | 5.496998  | 1.447916  |
| 96 | 1 | 0 | -1.472816 | 4.798082  | 2.953115  |



|     |   |   |           |          |          |
|-----|---|---|-----------|----------|----------|
| 97  | 6 | 0 | -0.003089 | 3.569073 | 1.945415 |
| 98  | 1 | 0 | 0.708904  | 3.854901 | 2.724783 |
| 99  | 1 | 0 | 0.530575  | 3.582512 | 0.988815 |
| 100 | 6 | 0 | -0.568986 | 2.173621 | 2.190870 |
| 101 | 1 | 0 | 0.226526  | 1.431812 | 2.225655 |
| 102 | 1 | 0 | -1.081620 | 2.139057 | 3.162652 |
| 103 | 6 | 0 | -2.381189 | 2.725520 | 0.780721 |

---

## References:

1. (a) Parker, C. A. and Rees, W. T. *Analyst* 1960, **85**, 587, (b) Crosby, G. A.; Demas, J. N. *J. Phys. Chem.* 1971, **75**, 991.
2. Würth, C.; Grabolle, M.; Pauli, J.; Spieles, M.; Resch-Genger, U. *Nat. Protocol* 2013, **8**, 1535.
3. Wang, J.; Hanan, G. S. *Synlett*, 2005, **8**, 1251.
4. a) Santoni, M.-P.; Pal, A. K.; Hanan, G. S.; Proust, A.; Hasenknopf, B. *Inorg. Chem. Commun.* 2011, **14**, 399; b) M. I. J. Polson, E. A. Medlycott, G. S. Hanan, L. Mikelsons, N. J. Taylor, M. Watanabe, Y. Tanaka, F. Loiseau, R. Passalacqua, S. Campagna, *Chem. Eur. J.*, 2004, **10**, 3640; c) E. A. Medlycott, K. A. Udachin, G. S. Hanan, *Dalton Trans.*, 2007, 430.
5. *APEX2 (2007) version 2.4-0; Bruker Molecular Analysis Research Tool*. Bruker AXS Inc., Madison, WI 53719-1173.
6. Sheldrick, G. M. (1996). *SADABS*, Bruker Area Detector Absorption Corrections. Bruker AXS Inc., Madison, WI 53719-1173.
7. *SHELXTL (2001) version 6.12*; Bruker Analytical X-ray Systems Inc., Madison, WI 53719-1173.
8. Platon (A. L. SPEK, 2003).

9. Siemeling, U.; Bruggen, J. V. der; Vorfeld, U.; Neumann, B.; Stammeler, A.; Stammeler, H.-G.; Brockhinke, A.; Plessow, R.; Zanello, P.; Laschi, F.; Biani, F. F. de; Fontani, M.; Steenken, S.; Stapper, M. and Gurzadyan G. *Chem. Eur. J.*, 2003, **9**, 2819.
10. Medlycott, E. A.; Hanan, G. S.; Loiseau, F.; Campagna, S. *Chem. Eur. J.* 2007, **13**, 2837.
